# Supplementary material for: Flotillin-mediated membrane fluidity controls peptidoglycan synthesis and MreB movement
Source: eLife. 2020 Jul 14;9:e57179. doi: 10.7554/eLife.57179 (PMC7360373; doi:10.7554/eLife.57179)
Supplement: Figure 1—figure supplement 1—source data 1. [file elife-57179-fig1-figsupp1-data1.xlsx]

## Sheet: Raw data and basic
	600
	Kinetic read	A1	A2	A3	A4	A5	A6	A7	A8	A9	A10	A11	A12	B1	B2	B3	B4	B5	B6	B7	B8	B9	B10	B11	B12	C1	C2	C3	C4	C5	C6	C7	C8	C9	C10	C11	C12	D1	D2	D3	D4	D5	D6	D7	D8	D9	D10	D11	D12
	00:00:00	0.08	0.08	0.081	0.08	0.081	0.082	0.081	0.077	0.081	0.081	0.082	0.082	0.073	0.072	0.074	0.074	0.073	0.075	0.058	0.058	0.058	0.058	0.059	0.059	0.082	0.078	0.08	0.08	0.08	0.08	0.079	0.079	0.08	0.086	0.08	0.08	0.072	0.07	0.072	0.072	0.078	0.072	0.058	0.058	0.058	0.058	0.058	0.06
	00:10:00	0.08	0.08	0.081	0.08	0.081	0.081	0.081	0.078	0.08	0.081	0.082	0.082	0.073	0.071	0.073	0.073	0.073	0.074	0.058	0.058	0.058	0.058	0.059	0.059	0.08	0.078	0.079	0.08	0.08	0.079	0.079	0.079	0.08	0.085	0.081	0.08	0.072	0.07	0.071	0.072	0.077	0.072	0.058	0.058	0.058	0.058	0.058	0.059
	00:20:00	0.08	0.079	0.081	0.08	0.08	0.081	0.081	0.078	0.081	0.081	0.085	0.083	0.074	0.072	0.074	0.074	0.075	0.075	0.058	0.058	0.059	0.058	0.059	0.06	0.079	0.077	0.079	0.08	0.079	0.079	0.079	0.079	0.08	0.085	0.081	0.08	0.071	0.07	0.071	0.071	0.076	0.071	0.058	0.058	0.058	0.058	0.058	0.059
	00:30:00	0.08	0.079	0.081	0.08	0.081	0.081	0.082	0.08	0.081	0.082	0.083	0.084	0.074	0.072	0.073	0.073	0.074	0.074	0.058	0.059	0.059	0.058	0.059	0.059	0.079	0.077	0.079	0.08	0.079	0.08	0.08	0.08	0.08	0.086	0.081	0.081	0.071	0.069	0.071	0.072	0.076	0.071	0.058	0.057	0.058	0.058	0.058	0.059
	00:40:00	0.08	0.079	0.08	0.08	0.08	0.081	0.082	0.078	0.082	0.083	0.084	0.084	0.073	0.072	0.074	0.074	0.074	0.074	0.059	0.058	0.059	0.058	0.059	0.059	0.079	0.077	0.079	0.079	0.079	0.079	0.08	0.079	0.08	0.087	0.082	0.081	0.071	0.069	0.07	0.071	0.075	0.071	0.058	0.057	0.057	0.057	0.058	0.06
	00:50:00	0.08	0.08	0.081	0.081	0.081	0.082	0.084	0.079	0.083	0.084	0.085	0.085	0.073	0.072	0.074	0.073	0.074	0.075	0.058	0.058	0.059	0.058	0.059	0.059	0.079	0.078	0.079	0.08	0.079	0.08	0.081	0.08	0.081	0.088	0.082	0.082	0.072	0.07	0.071	0.071	0.076	0.071	0.058	0.058	0.058	0.058	0.058	0.06
	01:00:00	0.08	0.079	0.081	0.081	0.081	0.081	0.085	0.08	0.085	0.085	0.086	0.087	0.074	0.072	0.074	0.073	0.074	0.074	0.058	0.058	0.059	0.059	0.058	0.059	0.079	0.078	0.079	0.08	0.079	0.08	0.082	0.082	0.082	0.089	0.084	0.083	0.071	0.069	0.071	0.071	0.076	0.071	0.058	0.058	0.057	0.057	0.058	0.059
	01:10:00	0.08	0.079	0.082	0.081	0.081	0.082	0.086	0.082	0.086	0.087	0.089	0.089	0.074	0.072	0.074	0.074	0.073	0.074	0.058	0.058	0.058	0.058	0.058	0.058	0.079	0.077	0.079	0.08	0.079	0.08	0.082	0.082	0.083	0.091	0.085	0.084	0.07	0.069	0.07	0.071	0.076	0.071	0.058	0.057	0.058	0.057	0.058	0.059
	01:20:00	0.081	0.08	0.082	0.081	0.081	0.081	0.089	0.084	0.089	0.089	0.091	0.091	0.074	0.072	0.075	0.075	0.075	0.075	0.059	0.058	0.059	0.058	0.059	0.059	0.08	0.078	0.08	0.08	0.079	0.08	0.083	0.083	0.084	0.094	0.087	0.086	0.07	0.069	0.07	0.07	0.075	0.07	0.058	0.057	0.057	0.057	0.057	0.059
	01:30:00	0.08	0.081	0.082	0.081	0.082	0.082	0.093	0.088	0.094	0.092	0.094	0.095	0.074	0.073	0.075	0.074	0.074	0.075	0.059	0.058	0.059	0.059	0.059	0.06	0.08	0.079	0.081	0.08	0.08	0.081	0.086	0.086	0.086	0.097	0.09	0.088	0.071	0.069	0.07	0.071	0.076	0.07	0.058	0.057	0.057	0.056	0.057	0.059
	01:40:00	0.082	0.082	0.084	0.083	0.083	0.084	0.102	0.093	0.101	0.096	0.101	0.1	0.073	0.072	0.073	0.073	0.073	0.074	0.058	0.058	0.058	0.058	0.058	0.058	0.081	0.079	0.082	0.081	0.081	0.082	0.088	0.089	0.089	0.101	0.094	0.092	0.071	0.07	0.071	0.071	0.076	0.071	0.058	0.058	0.058	0.057	0.058	0.059
	01:50:00	0.082	0.083	0.085	0.084	0.083	0.084	0.111	0.102	0.109	0.104	0.107	0.106	0.073	0.071	0.073	0.073	0.073	0.074	0.058	0.057	0.058	0.057	0.058	0.058	0.081	0.08	0.083	0.081	0.081	0.083	0.091	0.092	0.093	0.107	0.098	0.097	0.071	0.069	0.071	0.071	0.076	0.071	0.058	0.058	0.058	0.058	0.058	0.06
	02:00:00	0.085	0.085	0.088	0.086	0.085	0.086	0.124	0.114	0.122	0.114	0.118	0.116	0.073	0.071	0.073	0.073	0.073	0.073	0.057	0.057	0.058	0.057	0.058	0.057	0.083	0.082	0.085	0.083	0.083	0.084	0.101	0.098	0.098	0.114	0.105	0.101	0.072	0.07	0.072	0.072	0.077	0.072	0.059	0.058	0.058	0.059	0.059	0.061
	02:10:00	0.086	0.088	0.091	0.086	0.085	0.087	0.142	0.128	0.14	0.125	0.127	0.127	0.074	0.072	0.074	0.075	0.074	0.075	0.058	0.058	0.059	0.059	0.059	0.059	0.083	0.083	0.087	0.083	0.083	0.084	0.105	0.107	0.109	0.123	0.113	0.108	0.071	0.069	0.07	0.07	0.075	0.07	0.057	0.057	0.057	0.057	0.057	0.059
	02:20:00	0.09	0.092	0.095	0.089	0.088	0.093	0.173	0.151	0.172	0.143	0.15	0.147	0.074	0.072	0.074	0.075	0.074	0.074	0.058	0.058	0.058	0.058	0.059	0.059	0.085	0.086	0.091	0.085	0.085	0.086	0.114	0.115	0.114	0.135	0.124	0.118	0.071	0.069	0.07	0.07	0.076	0.071	0.058	0.058	0.057	0.057	0.058	0.059
	02:30:00	0.095	0.099	0.103	0.093	0.092	0.096	0.199	0.179	0.196	0.167	0.175	0.172	0.074	0.072	0.074	0.074	0.074	0.074	0.058	0.058	0.059	0.058	0.059	0.059	0.088	0.089	0.094	0.087	0.088	0.088	0.127	0.131	0.129	0.152	0.138	0.131	0.071	0.069	0.07	0.071	0.076	0.071	0.058	0.057	0.057	0.057	0.058	0.059
	02:40:00	0.104	0.11	0.115	0.098	0.098	0.103	0.246	0.21	0.241	0.196	0.21	0.205	0.074	0.072	0.074	0.074	0.074	0.074	0.059	0.058	0.059	0.058	0.059	0.058	0.091	0.099	0.1	0.09	0.091	0.092	0.148	0.153	0.148	0.173	0.155	0.149	0.071	0.069	0.071	0.071	0.076	0.071	0.058	0.058	0.057	0.057	0.058	0.059
	02:50:00	0.114	0.124	0.133	0.106	0.105	0.113	0.309	0.257	0.297	0.215	0.227	0.223	0.073	0.072	0.074	0.074	0.074	0.074	0.059	0.058	0.059	0.059	0.059	0.059	0.097	0.098	0.107	0.093	0.095	0.094	0.165	0.17	0.166	0.198	0.179	0.172	0.071	0.069	0.07	0.071	0.075	0.071	0.057	0.057	0.057	0.057	0.057	0.059
	03:00:00	0.132	0.143	0.159	0.117	0.116	0.13	0.359	0.304	0.349	0.255	0.268	0.264	0.074	0.072	0.074	0.074	0.075	0.075	0.058	0.059	0.059	0.059	0.059	0.059	0.102	0.103	0.111	0.097	0.098	0.097	0.184	0.204	0.185	0.21	0.194	0.191	0.071	0.069	0.07	0.07	0.075	0.07	0.057	0.057	0.057	0.056	0.058	0.059
	03:10:00	0.156	0.173	0.19	0.132	0.131	0.148	0.398	0.335	0.387	0.307	0.322	0.311	0.073	0.071	0.073	0.074	0.073	0.073	0.058	0.057	0.058	0.058	0.058	0.059	0.105	0.11	0.119	0.1	0.103	0.102	0.201	0.202	0.201	0.226	0.209	0.205	0.071	0.07	0.071	0.071	0.076	0.071	0.058	0.058	0.058	0.058	0.058	0.06
	03:20:00	0.177	0.205	0.228	0.156	0.152	0.176	0.445	0.375	0.435	0.353	0.363	0.361	0.074	0.072	0.074	0.073	0.073	0.074	0.058	0.057	0.058	0.058	0.058	0.058	0.109	0.116	0.125	0.105	0.108	0.107	0.206	0.205	0.205	0.245	0.228	0.222	0.07	0.069	0.07	0.071	0.076	0.072	0.058	0.058	0.058	0.058	0.058	0.06
	03:30:00	0.218	0.257	0.29	0.183	0.181	0.21	0.495	0.419	0.482	0.366	0.381	0.377	0.074	0.072	0.075	0.074	0.074	0.074	0.059	0.059	0.059	0.059	0.06	0.059	0.115	0.123	0.132	0.111	0.114	0.114	0.208	0.207	0.204	0.259	0.242	0.236	0.071	0.069	0.07	0.071	0.076	0.071	0.057	0.056	0.057	0.057	0.057	0.059
	03:40:00	0.272	0.295	0.332	0.226	0.223	0.263	0.542	0.463	0.535	0.392	0.411	0.404	0.074	0.072	0.074	0.074	0.074	0.075	0.058	0.058	0.059	0.059	0.059	0.059	0.122	0.127	0.134	0.117	0.122	0.121	0.21	0.213	0.208	0.26	0.246	0.242	0.071	0.069	0.07	0.071	0.076	0.07	0.057	0.057	0.057	0.056	0.057	0.059
	03:50:00	0.315	0.325	0.374	0.28	0.277	0.318	0.594	0.51	0.588	0.428	0.449	0.441	0.073	0.071	0.073	0.073	0.074	0.074	0.058	0.058	0.058	0.057	0.059	0.058	0.128	0.129	0.139	0.125	0.129	0.128	0.22	0.217	0.221	0.254	0.245	0.241	0.071	0.07	0.071	0.071	0.077	0.071	0.058	0.058	0.058	0.058	0.058	0.06
	04:00:00	0.36	0.361	0.419	0.321	0.321	0.354	0.642	0.555	0.64	0.464	0.48	0.471	0.075	0.072	0.074	0.074	0.074	0.074	0.058	0.058	0.059	0.058	0.058	0.058	0.133	0.132	0.139	0.129	0.131	0.129	0.229	0.228	0.229	0.241	0.237	0.237	0.071	0.069	0.07	0.071	0.076	0.071	0.058	0.058	0.057	0.057	0.058	0.06
	04:10:00	0.384	0.406	0.469	0.361	0.361	0.393	0.681	0.599	0.689	0.497	0.515	0.507	0.075	0.072	0.075	0.075	0.075	0.074	0.058	0.058	0.059	0.058	0.059	0.059	0.132	0.132	0.144	0.129	0.129	0.13	0.242	0.243	0.242	0.238	0.229	0.224	0.07	0.069	0.07	0.07	0.076	0.071	0.057	0.057	0.057	0.057	0.057	0.059
	04:20:00	0.441	0.457	0.526	0.401	0.401	0.446	0.718	0.638	0.734	0.531	0.552	0.544	0.074	0.072	0.074	0.073	0.073	0.074	0.058	0.059	0.058	0.058	0.058	0.058	0.137	0.139	0.154	0.127	0.128	0.127	0.26	0.265	0.259	0.236	0.225	0.223	0.071	0.069	0.071	0.071	0.077	0.071	0.058	0.057	0.058	0.057	0.058	0.059
	04:30:00	0.496	0.511	0.583	0.453	0.456	0.5	0.754	0.671	0.767	0.567	0.585	0.578	0.073	0.071	0.074	0.073	0.073	0.074	0.057	0.058	0.058	0.057	0.058	0.058	0.145	0.152	0.172	0.129	0.132	0.13	0.285	0.29	0.286	0.234	0.225	0.223	0.072	0.07	0.071	0.072	0.077	0.071	0.058	0.057	0.058	0.058	0.058	0.06
	04:40:00	0.545	0.56	0.63	0.505	0.51	0.55	0.779	0.695	0.794	0.6	0.619	0.612	0.073	0.071	0.073	0.073	0.074	0.074	0.058	0.058	0.058	0.058	0.058	0.058	0.154	0.17	0.198	0.135	0.142	0.139	0.314	0.32	0.316	0.232	0.224	0.223	0.072	0.07	0.071	0.072	0.076	0.071	0.057	0.058	0.057	0.057	0.058	0.059
	04:50:00	0.592	0.603	0.67	0.556	0.563	0.6	0.801	0.719	0.82	0.636	0.655	0.649	0.073	0.072	0.073	0.073	0.074	0.074	0.058	0.058	0.058	0.058	0.058	0.058	0.171	0.194	0.228	0.149	0.16	0.156	0.347	0.351	0.349	0.231	0.223	0.221	0.071	0.07	0.071	0.072	0.076	0.071	0.058	0.058	0.057	0.057	0.058	0.06
	05:00:00	0.636	0.643	0.706	0.602	0.61	0.643	0.819	0.747	0.846	0.671	0.691	0.685	0.073	0.072	0.074	0.074	0.074	0.074	0.058	0.058	0.058	0.058	0.059	0.058	0.196	0.21	0.249	0.171	0.187	0.183	0.38	0.383	0.382	0.229	0.221	0.221	0.072	0.069	0.071	0.071	0.076	0.071	0.058	0.057	0.058	0.057	0.058	0.06
	05:10:00	0.672	0.676	0.742	0.639	0.649	0.68	0.838	0.765	0.865	0.703	0.725	0.72	0.074	0.072	0.076	0.073	0.074	0.074	0.058	0.058	0.059	0.059	0.059	0.058	0.226	0.235	0.279	0.201	0.223	0.219	0.421	0.42	0.42	0.228	0.221	0.22	0.071	0.069	0.07	0.071	0.076	0.071	0.057	0.057	0.057	0.057	0.057	0.059
	05:20:00	0.703	0.703	0.771	0.672	0.684	0.713	0.861	0.786	0.886	0.735	0.754	0.753	0.074	0.071	0.075	0.073	0.074	0.074	0.058	0.057	0.058	0.058	0.058	0.058	0.242	0.26	0.313	0.23	0.244	0.24	0.459	0.458	0.461	0.23	0.222	0.222	0.071	0.07	0.071	0.072	0.076	0.071	0.058	0.058	0.058	0.057	0.058	0.059
	05:30:00	0.731	0.722	0.793	0.703	0.718	0.746	0.875	0.805	0.905	0.763	0.781	0.779	0.073	0.072	0.077	0.074	0.073	0.074	0.058	0.057	0.058	0.058	0.058	0.058	0.27	0.294	0.359	0.26	0.279	0.276	0.499	0.496	0.501	0.233	0.225	0.224	0.072	0.07	0.071	0.071	0.077	0.071	0.058	0.058	0.057	0.057	0.058	0.059
	05:40:00	0.759	0.739	0.813	0.733	0.747	0.771	0.887	0.821	0.931	0.79	0.812	0.807	0.074	0.072	0.078	0.074	0.074	0.075	0.058	0.058	0.059	0.059	0.059	0.059	0.299	0.334	0.405	0.293	0.316	0.314	0.537	0.539	0.539	0.237	0.228	0.227	0.071	0.069	0.07	0.071	0.076	0.07	0.058	0.057	0.057	0.057	0.057	0.059
	05:50:00	0.775	0.756	0.826	0.758	0.771	0.793	0.904	0.841	0.948	0.811	0.83	0.83	0.074	0.072	0.078	0.074	0.073	0.075	0.058	0.058	0.059	0.058	0.059	0.059	0.337	0.376	0.451	0.335	0.363	0.36	0.577	0.58	0.579	0.243	0.234	0.233	0.071	0.069	0.071	0.071	0.076	0.071	0.058	0.057	0.057	0.057	0.057	0.059
	06:00:00	0.79	0.775	0.838	0.778	0.791	0.811	0.922	0.862	0.974	0.831	0.85	0.85	0.073	0.072	0.08	0.074	0.074	0.075	0.058	0.058	0.059	0.058	0.058	0.059	0.378	0.418	0.495	0.381	0.412	0.407	0.619	0.619	0.618	0.251	0.242	0.24	0.071	0.069	0.071	0.071	0.077	0.071	0.057	0.057	0.057	0.057	0.058	0.059
	06:10:00	0.805	0.792	0.853	0.793	0.804	0.82	0.941	0.878	0.986	0.854	0.871	0.872	0.074	0.071	0.087	0.074	0.073	0.074	0.058	0.057	0.057	0.057	0.058	0.058	0.428	0.456	0.531	0.43	0.458	0.453	0.654	0.659	0.655	0.262	0.252	0.251	0.071	0.069	0.071	0.07	0.076	0.071	0.058	0.057	0.058	0.057	0.058	0.059
	06:20:00	0.812	0.811	0.872	0.807	0.817	0.833	0.96	0.894	1.01	0.876	0.893	0.892	0.073	0.071	0.096	0.073	0.073	0.074	0.057	0.057	0.058	0.057	0.059	0.059	0.472	0.489	0.566	0.477	0.501	0.497	0.687	0.688	0.69	0.276	0.265	0.264	0.072	0.07	0.071	0.072	0.077	0.071	0.058	0.058	0.058	0.058	0.058	0.059
	06:30:00	0.824	0.831	0.891	0.818	0.829	0.848	0.975	0.912	1.024	0.895	0.913	0.911	0.073	0.072	0.102	0.074	0.074	0.075	0.058	0.058	0.059	0.058	0.059	0.059	0.51	0.524	0.598	0.521	0.543	0.54	0.716	0.719	0.72	0.291	0.281	0.279	0.071	0.069	0.071	0.071	0.076	0.071	0.058	0.057	0.057	0.058	0.057	0.059
	06:40:00	0.841	0.85	0.912	0.836	0.85	0.87	0.998	0.915	1.037	0.914	0.932	0.93	0.074	0.071	0.121	0.074	0.074	0.074	0.058	0.058	0.059	0.058	0.058	0.059	0.545	0.556	0.628	0.562	0.584	0.58	0.741	0.738	0.746	0.309	0.297	0.294	0.071	0.07	0.071	0.071	0.076	0.071	0.057	0.057	0.057	0.057	0.057	0.059
	06:50:00	0.854	0.872	0.935	0.856	0.869	0.891	1.014	0.919	1.036	0.932	0.951	0.948	0.072	0.072	0.139	0.074	0.074	0.074	0.058	0.057	0.058	0.058	0.058	0.059	0.571	0.586	0.657	0.599	0.618	0.617	0.763	0.755	0.765	0.329	0.317	0.313	0.072	0.069	0.072	0.071	0.077	0.072	0.058	0.058	0.058	0.058	0.058	0.06
	07:00:00	0.871	0.888	0.954	0.874	0.891	0.913	1.03	0.919	1.036	0.947	0.965	0.965	0.073	0.072	0.167	0.073	0.073	0.074	0.058	0.058	0.058	0.057	0.058	0.058	0.597	0.61	0.68	0.631	0.655	0.654	0.78	0.781	0.785	0.351	0.339	0.335	0.071	0.069	0.07	0.071	0.077	0.071	0.058	0.057	0.058	0.058	0.058	0.059
	07:10:00	0.887	0.906	0.976	0.896	0.912	0.932	1.046	0.923	1.031	0.959	0.982	0.978	0.074	0.072	0.209	0.074	0.074	0.074	0.058	0.057	0.058	0.057	0.058	0.058	0.624	0.633	0.702	0.664	0.686	0.688	0.806	0.803	0.807	0.376	0.363	0.359	0.071	0.069	0.071	0.071	0.076	0.071	0.058	0.058	0.057	0.058	0.058	0.06
	07:20:00	0.903	0.92	0.995	0.915	0.933	0.953	1.053	0.919	1.03	0.972	0.989	0.99	0.074	0.072	0.269	0.074	0.074	0.074	0.058	0.058	0.058	0.058	0.058	0.059	0.648	0.655	0.725	0.692	0.716	0.716	0.831	0.829	0.833	0.406	0.391	0.385	0.07	0.069	0.07	0.071	0.075	0.071	0.057	0.057	0.057	0.057	0.057	0.059
	07:30:00	0.921	0.929	1.014	0.933	0.953	0.972	1.057	0.91	1.027	0.984	1.002	1.002	0.073	0.071	0.297	0.074	0.074	0.075	0.058	0.058	0.058	0.057	0.058	0.058	0.666	0.683	0.742	0.715	0.737	0.741	0.856	0.852	0.86	0.442	0.427	0.419	0.071	0.07	0.071	0.071	0.076	0.071	0.058	0.057	0.058	0.058	0.058	0.059
	07:40:00	0.939	0.932	1.033	0.953	0.972	0.993	1.054	0.912	1.028	0.995	1.011	1.013	0.074	0.072	0.337	0.075	0.074	0.075	0.058	0.058	0.058	0.058	0.058	0.059	0.685	0.697	0.764	0.739	0.761	0.762	0.877	0.874	0.884	0.478	0.461	0.454	0.07	0.069	0.07	0.07	0.076	0.071	0.057	0.057	0.057	0.057	0.057	0.058
	07:50:00	0.951	0.93	1.047	0.971	0.993	1.012	1.054	0.912	1.025	1.002	1.017	1.016	0.073	0.072	0.373	0.073	0.074	0.076	0.058	0.058	0.058	0.058	0.058	0.058	0.706	0.715	0.784	0.764	0.78	0.782	0.904	0.888	0.912	0.516	0.499	0.489	0.071	0.069	0.07	0.071	0.076	0.07	0.057	0.057	0.057	0.057	0.058	0.06
	08:00:00	0.964	0.924	1.048	0.988	1.012	1.03	1.051	0.91	1.022	1.006	1.019	1.018	0.074	0.072	0.434	0.074	0.074	0.075	0.059	0.059	0.058	0.058	0.059	0.059	0.722	0.735	0.805	0.785	0.802	0.803	0.924	0.898	0.933	0.551	0.53	0.521	0.07	0.069	0.07	0.071	0.076	0.07	0.057	0.056	0.057	0.057	0.057	0.058
	08:10:00	0.975	0.92	1.048	1.005	1.024	1.029	1.051	0.912	1.024	1.008	1.021	1.02	0.074	0.072	0.495	0.074	0.074	0.074	0.058	0.058	0.059	0.058	0.058	0.059	0.745	0.757	0.825	0.81	0.827	0.827	0.947	0.909	0.954	0.595	0.577	0.564	0.071	0.07	0.071	0.072	0.077	0.072	0.058	0.058	0.057	0.058	0.058	0.059
	08:20:00	0.983	0.916	1.047	1.014	1.026	1.029	1.05	0.914	1.033	1.007	1.021	1.018	0.073	0.071	0.557	0.074	0.073	0.074	0.058	0.058	0.058	0.057	0.058	0.058	0.763	0.783	0.848	0.831	0.85	0.85	0.962	0.91	0.969	0.631	0.614	0.601	0.072	0.07	0.07	0.072	0.078	0.072	0.058	0.058	0.058	0.058	0.058	0.06
	08:30:00	0.985	0.91	1.04	1.017	1.023	1.029	1.049	0.912	1.027	1.008	1.019	1.024	0.074	0.072	0.61	0.074	0.074	0.075	0.058	0.058	0.058	0.058	0.059	0.059	0.78	0.797	0.865	0.854	0.874	0.876	0.975	0.911	0.983	0.667	0.65	0.635	0.071	0.069	0.071	0.071	0.077	0.072	0.058	0.058	0.058	0.058	0.058	0.06
	08:40:00	0.983	0.908	1.036	1.016	1.021	1.021	1.047	0.913	1.025	1.007	1.038	1.022	0.074	0.072	0.657	0.075	0.075	0.076	0.058	0.059	0.059	0.058	0.059	0.059	0.794	0.814	0.884	0.875	0.894	0.896	0.976	0.91	0.985	0.691	0.678	0.667	0.071	0.069	0.07	0.071	0.075	0.071	0.057	0.056	0.057	0.057	0.057	0.059
	08:50:00	0.977	0.904	1.032	1.014	1.016	1.021	1.045	0.921	1.029	1.009	1.038	1.023	0.074	0.072	0.699	0.074	0.074	0.075	0.058	0.057	0.058	0.057	0.058	0.058	0.814	0.826	0.903	0.897	0.916	0.921	0.976	0.911	0.986	0.718	0.704	0.688	0.071	0.07	0.072	0.072	0.077	0.071	0.058	0.058	0.058	0.058	0.058	0.06
	09:00:00	0.973	0.904	1.031	1.009	1.012	1.016	1.046	0.909	1.025	1.011	1.038	1.023	0.073	0.072	0.736	0.074	0.074	0.075	0.058	0.058	0.058	0.058	0.058	0.058	0.831	0.84	0.923	0.913	0.94	0.942	0.978	0.91	0.985	0.74	0.728	0.711	0.071	0.07	0.071	0.071	0.076	0.071	0.058	0.058	0.057	0.057	0.058	0.06
	09:10:00	0.967	0.906	1.029	1.01	1.011	1.016	1.044	0.913	1.025	1.013	1.036	1.023	0.073	0.072	0.766	0.074	0.074	0.075	0.058	0.057	0.058	0.057	0.058	0.058	0.849	0.848	0.94	0.937	0.959	0.966	0.977	0.912	0.986	0.761	0.75	0.734	0.072	0.07	0.072	0.072	0.077	0.072	0.058	0.058	0.058	0.058	0.059	0.06
	09:20:00	0.959	0.902	1.027	1.005	1.005	1.012	1.042	0.914	1.023	1.039	1.041	1.023	0.074	0.072	0.79	0.074	0.075	0.076	0.058	0.058	0.058	0.058	0.058	0.058	0.866	0.848	0.953	0.956	0.976	0.984	0.976	0.913	0.987	0.78	0.77	0.751	0.071	0.069	0.071	0.071	0.076	0.07	0.057	0.057	0.057	0.057	0.057	0.059
	09:30:00	0.954	0.903	1.027	1.001	1.003	1.007	1.043	0.911	1.024	1.03	1.045	1.027	0.073	0.071	0.809	0.074	0.074	0.074	0.058	0.057	0.058	0.057	0.058	0.058	0.876	0.849	0.963	0.968	0.991	0.994	0.982	0.909	0.987	0.8	0.79	0.771	0.072	0.07	0.072	0.072	0.077	0.072	0.058	0.058	0.059	0.058	0.058	0.06
	09:40:00	0.947	0.904	1.027	1.002	1	1.01	1.045	0.909	1.024	1.037	1.044	1.028	0.073	0.073	0.822	0.075	0.074	0.075	0.057	0.057	0.058	0.057	0.058	0.058	0.889	0.845	0.963	0.982	0.996	1	0.98	0.911	0.988	0.819	0.807	0.787	0.072	0.07	0.072	0.071	0.077	0.071	0.058	0.058	0.058	0.058	0.057	0.06
	09:50:00	0.944	0.902	1.025	0.998	0.998	1.008	1.044	0.905	1.021	1.05	1.045	1.033	0.074	0.073	0.837	0.074	0.074	0.075	0.057	0.058	0.058	0.058	0.058	0.058	0.902	0.842	0.962	0.99	1	1.001	0.985	0.908	0.987	0.834	0.822	0.804	0.07	0.069	0.071	0.071	0.076	0.071	0.058	0.057	0.058	0.057	0.058	0.059
	10:00:00	0.942	0.905	1.028	0.997	0.998	1.005	1.045	0.902	1.018	1.045	1.047	1.032	0.073	0.072	0.854	0.074	0.074	0.075	0.057	0.057	0.058	0.057	0.058	0.059	0.904	0.844	0.961	0.99	0.997	1.004	0.985	0.91	0.99	0.85	0.84	0.819	0.072	0.071	0.072	0.072	0.078	0.072	0.059	0.058	0.058	0.058	0.058	0.06
	10:10:00	0.937	0.905	1.027	0.996	0.995	1.004	1.043	0.901	1.012	1.039	1.045	1.035	0.074	0.072	0.871	0.074	0.074	0.075	0.058	0.057	0.058	0.058	0.059	0.058	0.901	0.845	0.962	0.99	0.996	1	0.986	0.906	0.991	0.862	0.854	0.833	0.071	0.07	0.071	0.071	0.077	0.071	0.057	0.057	0.057	0.057	0.057	0.059
	10:20:00	0.936	0.906	1.028	0.994	0.995	1.001	1.043	0.894	1.011	1.044	1.045	1.033	0.074	0.072	0.89	0.074	0.074	0.075	0.058	0.058	0.058	0.058	0.058	0.058	0.898	0.851	0.965	0.989	0.995	1	0.987	0.909	0.992	0.878	0.867	0.848	0.071	0.07	0.071	0.071	0.077	0.072	0.057	0.058	0.057	0.057	0.058	0.059
	10:30:00	0.935	0.908	1.032	0.994	0.997	1.004	1.043	0.893	1.006	1.048	1.046	1.034	0.074	0.072	0.911	0.075	0.074	0.075	0.058	0.057	0.058	0.057	0.058	0.058	0.902	0.848	0.968	0.988	0.998	1.004	1.005	0.907	0.996	0.892	0.882	0.86	0.072	0.07	0.071	0.072	0.077	0.072	0.058	0.058	0.058	0.058	0.058	0.06
	10:40:00	0.932	0.905	1.03	0.991	0.996	1.001	1.041	0.88	1	1.03	1.044	1.032	0.073	0.072	0.931	0.075	0.074	0.075	0.058	0.058	0.059	0.058	0.059	0.059	0.893	0.851	0.97	0.987	0.997	1.001	1	0.911	0.998	0.904	0.891	0.873	0.071	0.07	0.071	0.072	0.076	0.071	0.057	0.057	0.057	0.057	0.057	0.059
	10:50:00	0.928	0.906	1.031	0.995	0.995	0.999	1.039	0.877	0.998	1.03	1.044	1.03	0.075	0.073	0.951	0.075	0.075	0.076	0.058	0.058	0.058	0.058	0.059	0.059	0.889	0.859	0.973	0.988	0.997	1	1.017	0.902	1.001	0.919	0.906	0.881	0.071	0.07	0.071	0.072	0.076	0.071	0.057	0.058	0.057	0.057	0.057	0.059
	11:00:00	0.928	0.908	1.034	0.992	0.997	0.998	1.035	0.873	0.993	1.038	1.042	1.032	0.074	0.072	0.973	0.075	0.075	0.076	0.058	0.058	0.059	0.058	0.058	0.059	0.891	0.866	0.977	0.989	1	1.007	1	0.903	0.993	0.924	0.913	0.895	0.071	0.07	0.071	0.071	0.076	0.071	0.057	0.057	0.057	0.057	0.057	0.059
	11:10:00	0.928	0.906	1.035	0.991	0.996	1	1.037	0.866	0.987	1.041	1.043	1.03	0.073	0.072	0.991	0.074	0.074	0.075	0.057	0.058	0.058	0.058	0.058	0.058	0.891	0.867	0.981	0.991	1	1.007	1.002	0.9	0.991	0.934	0.918	0.901	0.071	0.07	0.071	0.071	0.077	0.072	0.058	0.057	0.058	0.057	0.058	0.059
	11:20:00	0.927	0.906	1.038	0.994	0.999	1.001	1.033	0.863	0.984	1.04	1.043	1.028	0.074	0.072	1.007	0.074	0.074	0.075	0.058	0.058	0.058	0.058	0.058	0.058	0.892	0.872	0.988	0.993	1.002	1.004	1.006	0.903	0.99	0.937	0.922	0.903	0.071	0.07	0.071	0.072	0.077	0.072	0.058	0.057	0.057	0.058	0.058	0.06
	11:30:00	0.927	0.903	1.037	0.994	0.998	1.001	1.029	0.852	0.975	1.033	1.041	1.028	0.074	0.073	1.023	0.076	0.074	0.075	0.058	0.058	0.058	0.057	0.058	0.058	0.892	0.874	0.988	0.993	1.003	1.009	1.008	0.898	1.005	0.944	0.932	0.913	0.071	0.069	0.071	0.071	0.077	0.072	0.058	0.058	0.058	0.058	0.058	0.06
	11:40:00	0.927	0.899	1.04	0.992	0.998	1.001	1.024	0.845	0.965	1.031	1.039	1.022	0.074	0.073	1.038	0.075	0.075	0.076	0.058	0.058	0.058	0.058	0.059	0.058	0.893	0.884	0.995	0.994	1.004	1.007	1.011	0.896	1.006	0.948	0.93	0.91	0.071	0.069	0.071	0.072	0.076	0.071	0.057	0.057	0.057	0.057	0.057	0.059
	11:50:00	0.924	0.902	1.043	0.993	0.998	1.001	1.025	0.841	0.958	1.027	1.036	1.022	0.074	0.072	1.042	0.075	0.075	0.075	0.058	0.058	0.059	0.058	0.059	0.059	0.895	0.879	0.998	0.998	1.008	1.008	1.009	0.892	1.006	0.952	0.938	0.917	0.071	0.07	0.071	0.072	0.076	0.071	0.057	0.058	0.058	0.058	0.057	0.059
	12:00:00	0.925	0.894	1.04	0.998	0.998	1.001	1.027	0.836	0.953	1.032	1.035	1.019	0.074	0.072	1.042	0.075	0.074	0.075	0.058	0.058	0.058	0.058	0.058	0.058	0.899	0.885	1.004	1	1.009	1.01	1.004	0.896	1.007	0.959	0.941	0.922	0.071	0.07	0.071	0.072	0.077	0.072	0.058	0.057	0.057	0.057	0.058	0.06
	12:10:00	0.924	0.899	1.042	0.995	0.997	0.998	1.02	0.83	0.948	1.02	1.031	1.015	0.074	0.073	1.044	0.075	0.075	0.076	0.058	0.058	0.058	0.057	0.059	0.058	0.901	0.886	1.006	1	1.011	1.008	1.005	0.891	1.003	0.96	0.946	0.924	0.071	0.069	0.071	0.071	0.076	0.071	0.058	0.057	0.057	0.058	0.057	0.059
	12:20:00	0.921	0.89	1.039	0.994	0.995	0.999	1.017	0.826	0.938	1.01	1.028	1.009	0.074	0.073	1.038	0.075	0.074	0.075	0.058	0.058	0.058	0.058	0.058	0.059	0.902	0.891	1.011	1.002	1.006	1.008	0.999	0.885	1.001	0.967	0.952	0.929	0.071	0.07	0.071	0.071	0.076	0.071	0.057	0.057	0.057	0.057	0.057	0.059
	12:30:00	0.923	0.886	1.041	0.994	0.992	0.995	1.01	0.816	0.929	1.011	1.022	1.003	0.073	0.072	1.036	0.074	0.074	0.075	0.058	0.058	0.058	0.057	0.058	0.058	0.902	0.887	1.014	1.003	1.007	1.006	1.007	0.887	0.997	0.966	0.95	0.932	0.071	0.07	0.071	0.072	0.077	0.071	0.058	0.057	0.058	0.057	0.057	0.06
	12:40:00	0.924	0.882	1.042	0.999	0.991	0.995	1.007	0.824	0.925	1.011	1.018	1	0.075	0.072	1.034	0.075	0.074	0.075	0.058	0.058	0.058	0.058	0.059	0.058	0.909	0.892	1.016	1.008	1.011	1.01	1.001	0.883	0.99	0.975	0.96	0.935	0.07	0.07	0.071	0.071	0.077	0.072	0.058	0.057	0.057	0.057	0.057	0.06
	12:50:00	0.923	0.88	1.035	0.996	0.993	0.991	0.998	0.81	0.92	1.007	1.015	0.992	0.074	0.073	1.032	0.074	0.075	0.075	0.059	0.059	0.058	0.058	0.059	0.059	0.91	0.894	1.02	1.004	1.013	1.009	1	0.879	0.987	0.976	0.962	0.943	0.071	0.07	0.071	0.072	0.076	0.071	0.057	0.057	0.058	0.057	0.057	0.059
	13:00:00	0.921	0.873	1.034	0.995	0.99	0.993	0.995	0.817	0.917	0.995	1.007	0.987	0.075	0.073	1.03	0.075	0.075	0.075	0.059	0.059	0.058	0.058	0.058	0.058	0.914	0.896	1.021	1.006	1.009	1.009	0.996	0.88	0.985	0.98	0.964	0.943	0.07	0.07	0.071	0.071	0.077	0.072	0.056	0.057	0.058	0.057	0.057	0.059
	13:10:00	0.922	0.87	1.032	0.991	0.99	0.981	0.99	0.805	0.908	0.998	1.003	0.98	0.073	0.073	1.03	0.075	0.074	0.075	0.058	0.058	0.059	0.057	0.058	0.059	0.919	0.898	1.026	1.009	1.008	1.005	0.997	0.866	0.976	0.983	0.965	0.944	0.072	0.07	0.072	0.072	0.077	0.072	0.058	0.058	0.057	0.058	0.057	0.059
	13:20:00	0.921	0.86	1.028	0.991	0.986	0.978	1.002	0.799	0.907	0.978	0.994	0.973	0.074	0.073	1.03	0.075	0.075	0.075	0.058	0.058	0.058	0.058	0.059	0.059	0.918	0.892	1.025	1.008	1.007	1.001	0.989	0.87	0.978	0.981	0.968	0.95	0.071	0.07	0.072	0.072	0.077	0.072	0.058	0.057	0.058	0.057	0.057	0.059
	13:30:00	0.918	0.859	1.026	0.987	0.982	0.974	1.005	0.792	0.898	0.984	0.989	0.966	0.074	0.072	1.029	0.074	0.075	0.075	0.058	0.058	0.058	0.058	0.059	0.059	0.922	0.888	1.026	1.006	1.005	1.002	0.986	0.863	0.97	0.984	0.973	0.949	0.071	0.07	0.071	0.072	0.076	0.071	0.057	0.057	0.057	0.057	0.057	0.059
	13:40:00	0.917	0.852	1.02	0.985	0.981	0.968	1.003	0.786	0.892	0.964	0.98	0.957	0.074	0.072	1.029	0.075	0.075	0.075	0.058	0.058	0.059	0.058	0.059	0.059	0.921	0.887	1.027	1.005	1.006	0.998	0.992	0.856	0.97	0.988	0.97	0.95	0.071	0.07	0.071	0.071	0.076	0.072	0.057	0.057	0.057	0.057	0.057	0.059
	13:50:00	0.916	0.848	1.015	0.985	0.975	0.969	0.994	0.783	0.886	0.964	0.972	0.95	0.074	0.072	1.031	0.074	0.074	0.074	0.057	0.057	0.057	0.057	0.058	0.058	0.925	0.88	1.027	1.007	1.006	1	0.996	0.856	0.98	0.989	0.971	0.951	0.071	0.069	0.071	0.072	0.076	0.071	0.057	0.058	0.057	0.057	0.057	0.059
	14:00:00	0.914	0.841	1.009	0.982	0.972	0.958	0.987	0.777	0.881	0.961	0.966	0.94	0.073	0.072	1.032	0.075	0.074	0.075	0.058	0.058	0.058	0.058	0.058	0.058	0.924	0.879	1.026	1.005	1.004	0.995	0.995	0.848	0.968	0.989	0.973	0.96	0.071	0.07	0.071	0.072	0.077	0.072	0.057	0.058	0.057	0.057	0.058	0.059
	14:10:00	0.914	0.838	1.002	0.98	0.97	0.959	0.979	0.774	0.879	0.951	0.959	0.935	0.073	0.072	1.033	0.075	0.075	0.075	0.059	0.058	0.059	0.058	0.059	0.059	0.927	0.881	1.028	1.002	1.003	0.993	0.993	0.852	0.963	0.986	0.977	0.959	0.071	0.07	0.071	0.071	0.076	0.071	0.057	0.057	0.057	0.057	0.057	0.058
	14:20:00	0.911	0.832	0.998	0.974	0.963	0.951	0.968	0.766	0.873	0.941	0.951	0.924	0.072	0.072	1.033	0.074	0.074	0.075	0.058	0.057	0.058	0.058	0.058	0.059	0.921	0.875	1.022	1.004	0.999	0.988	0.975	0.846	0.96	0.989	0.973	0.964	0.071	0.07	0.072	0.072	0.076	0.072	0.057	0.057	0.057	0.057	0.057	0.059
	14:30:00	0.91	0.83	0.992	0.971	0.96	0.949	0.956	0.764	0.868	0.934	0.943	0.919	0.073	0.072	1.033	0.074	0.074	0.075	0.058	0.057	0.059	0.058	0.058	0.059	0.923	0.893	1.023	1.001	0.999	0.989	0.983	0.843	0.956	0.991	0.974	0.962	0.071	0.07	0.071	0.072	0.076	0.071	0.058	0.058	0.057	0.057	0.058	0.059
	14:40:00	0.91	0.823	0.989	0.964	0.954	0.943	0.946	0.761	0.861	0.922	0.937	0.908	0.073	0.072	1.035	0.075	0.074	0.075	0.057	0.057	0.058	0.058	0.058	0.058	0.924	0.885	1.024	0.999	1	0.987	0.983	0.838	0.955	0.988	0.974	0.957	0.071	0.07	0.073	0.072	0.077	0.072	0.058	0.058	0.058	0.058	0.058	0.06
	14:50:00	0.906	0.816	0.985	0.963	0.948	0.938	0.941	0.764	0.856	0.915	0.928	0.898	0.073	0.072	1.037	0.075	0.075	0.075	0.059	0.058	0.058	0.059	0.059	0.059	0.922	0.872	1.019	1	0.995	0.981	0.972	0.832	0.947	0.992	0.975	0.955	0.071	0.07	0.071	0.072	0.076	0.072	0.057	0.058	0.058	0.057	0.057	0.059
	15:00:00	0.904	0.808	0.978	0.957	0.944	0.928	0.936	0.753	0.851	0.913	0.921	0.891	0.073	0.072	1.038	0.074	0.075	0.075	0.058	0.058	0.059	0.057	0.058	0.058	0.919	0.867	1.016	0.996	0.993	0.977	0.967	0.827	0.939	0.989	0.975	0.96	0.072	0.07	0.072	0.072	0.076	0.071	0.058	0.057	0.057	0.058	0.058	0.06
	15:10:00	0.902	0.808	0.974	0.954	0.943	0.931	0.934	0.747	0.845	0.898	0.912	0.885	0.073	0.071	1.038	0.074	0.074	0.074	0.058	0.057	0.058	0.057	0.058	0.058	0.918	0.865	1.015	0.995	0.99	0.979	0.965	0.819	0.934	0.99	0.973	0.958	0.072	0.071	0.072	0.073	0.077	0.073	0.058	0.058	0.058	0.058	0.059	0.06
	15:20:00	0.902	0.804	0.964	0.95	0.932	0.928	0.924	0.745	0.842	0.895	0.905	0.875	0.073	0.072	1.04	0.075	0.075	0.076	0.058	0.058	0.059	0.058	0.058	0.059	0.923	0.877	1.012	0.992	0.988	0.975	0.961	0.816	0.934	0.988	0.975	0.955	0.071	0.07	0.071	0.071	0.075	0.071	0.057	0.057	0.057	0.057	0.058	0.059
	15:30:00	0.9	0.795	0.962	0.942	0.931	0.921	0.922	0.742	0.837	0.888	0.897	0.869	0.074	0.072	1.043	0.074	0.075	0.075	0.058	0.058	0.058	0.058	0.058	0.059	0.921	0.859	1.008	0.992	0.987	0.976	0.963	0.804	0.928	0.987	0.976	0.951	0.071	0.07	0.071	0.072	0.076	0.071	0.057	0.057	0.057	0.057	0.057	0.059
	15:40:00	0.894	0.792	0.956	0.936	0.923	0.915	0.917	0.736	0.832	0.879	0.89	0.863	0.074	0.072	1.041	0.074	0.074	0.075	0.058	0.057	0.058	0.058	0.058	0.059	0.911	0.854	1.002	0.987	0.979	0.966	0.952	0.81	0.924	0.98	0.971	0.953	0.07	0.069	0.071	0.072	0.076	0.071	0.057	0.057	0.057	0.057	0.057	0.059
	15:50:00	0.892	0.79	0.953	0.931	0.919	0.909	0.919	0.734	0.831	0.875	0.883	0.855	0.073	0.072	1.041	0.074	0.075	0.075	0.058	0.058	0.058	0.058	0.059	0.059	0.914	0.849	0.998	0.984	0.978	0.97	0.948	0.792	0.924	0.98	0.966	0.948	0.07	0.069	0.07	0.071	0.075	0.071	0.057	0.057	0.057	0.057	0.057	0.059
	16:00:00	0.888	0.783	0.947	0.93	0.916	0.913	0.913	0.728	0.825	0.864	0.874	0.847	0.073	0.072	1.039	0.074	0.075	0.074	0.058	0.058	0.058	0.058	0.058	0.058	0.908	0.846	0.995	0.982	0.98	0.964	0.942	0.787	0.931	0.977	0.966	0.947	0.071	0.07	0.072	0.072	0.076	0.072	0.058	0.058	0.057	0.057	0.058	0.059
		LB						LB Fosfomycin10						LB Fosfomycin 25						LB Fosfomycin 50
		Blank	WT	DponA	DfloATDponA	DfloAT		Blank	WT	DponA	DfloATDponA	DfloAT		Blank	WT	DponA	DfloATDponA	DfloAT		Blank	WT	DponA	DfloATDponA	DfloAT
	0	0.0725	0.00783333	0.00716667	0.00916667	0.0085	0	0.074	0.006	0.00533333	0.008	0.006	0	0.0743333	0.006	0.005	0.00533333	0.006	0	0.0863333	-0.000666667	-0.007	-0.006	-0.00733333
	10	0.072	0.00833333	0.00766667	0.00966667	0.00866667	10	0.0736667	0.00533333	0.00566667	0.00833333	0.006	10	0.0743333	0.00666667	0.00533333	0.006	0.006	10	0.0866667	0.000666667	-0.00733333	-0.00633333	-0.008
	20	0.073	0.007	0.007	0.01	0.00733333	20	0.0726667	0.00566667	0.00666667	0.00933333	0.00666667	20	0.0733333	0.00666667	0.006	0.00766667	0.006	20	0.0856667	0.00133333	-0.00666667	-0.00433333	-0.00666667
	30	0.073	0.007	0.008	0.01	0.00766667	30	0.073	0.00533333	0.007	0.00966667	0.00666667	30	0.0743333	0.00533333	0.00533333	0.00633333	0.00566667	30	0.0866667	0.000666667	-0.00733333	-0.00533333	-0.00733333
	40	0.0725	0.00716667	0.00816667	0.0111667	0.00783333	40	0.0723333	0.006	0.00733333	0.011	0.00666667	40	0.0733333	0.00666667	0.00666667	0.00733333	0.00633333	40	0.0863333	0.000666667	-0.007	-0.00433333	-0.00733333
	50	0.0725	0.00783333	0.0095	0.0121667	0.00883333	50	0.0726667	0.006	0.008	0.0113333	0.007	50	0.0736667	0.00633333	0.00666667	0.008	0.00633333	50	0.0866667	0.001	-0.00666667	-0.004	-0.00733333
	60	0.073	0.007	0.0103333	0.013	0.008	60	0.0726667	0.006	0.00933333	0.0126667	0.007	60	0.074	0.00633333	0.00733333	0.00833333	0.00566667	60	0.0866667	0.000666667	-0.00666667	-0.00333333	-0.007
	70	0.073	0.00733333	0.0116667	0.0153333	0.00833333	70	0.0726667	0.00566667	0.00966667	0.014	0.007	70	0.0733333	0.00666667	0.008	0.0106667	0.00666667	70	0.0863333	0.00133333	-0.00566667	-0.002	-0.007
	80	0.073	0.008	0.0143333	0.0173333	0.008	80	0.0716667	0.00766667	0.0116667	0.0173333	0.008	80	0.072	0.00733333	0.00933333	0.0126667	0.00666667	80	0.085	0.003	-0.004	0	-0.006
	90	0.0735	0.0075	0.0181667	0.0201667	0.00816667	90	0.0723333	0.00766667	0.0136667	0.0193333	0.008	90	0.0726667	0.007	0.01	0.013	0.00733333	90	0.0856667	0.00333333	-0.00366667	0.001	-0.00566667
	100	0.0725	0.0101667	0.0261667	0.0265	0.0108333	100	0.0726667	0.008	0.016	0.023	0.00866667	100	0.0736667	0.00866667	0.0116667	0.016	0.008	100	0.087	0.00266667	-0.00366667	0.00266667	-0.00666667
	110	0.072	0.0113333	0.0353333	0.0336667	0.0116667	110	0.0726667	0.00866667	0.0193333	0.028	0.009	110	0.0736667	0.00866667	0.013	0.019	0.00833333	110	0.087	0.00366667	-0.00233333	0.00466667	-0.006
	120	0.072	0.014	0.048	0.044	0.0136667	120	0.0736667	0.00966667	0.0253333	0.033	0.00966667	120	0.0743333	0.0106667	0.0156667	0.0223333	0.00933333	120	0.0876667	0.00466667	-0.00133333	0.00733333	-0.006
	130	0.073	0.0153333	0.0636667	0.0533333	0.013	130	0.0716667	0.0126667	0.0353333	0.043	0.0116667	130	0.0723333	0.0126667	0.0173333	0.026	0.01	130	0.0853333	0.00633333	0.00166667	0.012	-0.00333333
	140	0.073	0.0193333	0.0923333	0.0736667	0.017	140	0.0723333	0.015	0.042	0.0533333	0.013	140	0.0723333	0.014	0.02	0.033	0.011	140	0.0856667	0.007	0.003	0.0153333	-0.00333333
	150	0.073	0.026	0.118333	0.0983333	0.0206667	150	0.0726667	0.0176667	0.0563333	0.0676667	0.015	150	0.073	0.015	0.0223333	0.0373333	0.0123333	150	0.086	0.00766667	0.00533333	0.0183333	-0.003
	160	0.073	0.0366667	0.159333	0.130667	0.0266667	160	0.0726667	0.024	0.077	0.0863333	0.0183333	160	0.074	0.0156667	0.025	0.045	0.0123333	160	0.0863333	0.00833333	0.00666667	0.0243333	-0.00233333
	170	0.0725	0.0511667	0.215167	0.149167	0.0355	170	0.0723333	0.0283333	0.0946667	0.110667	0.0216667	170	0.0726667	0.0193333	0.0323333	0.0546667	0.014	170	0.0856667	0.009	0.0123333	0.0316667	-0.00133333
	180	0.073	0.0716667	0.264333	0.189333	0.048	180	0.0716667	0.0336667	0.119333	0.126667	0.0256667	180	0.072	0.021	0.0393333	0.067	0.015	180	0.0853333	0.0106667	0.0163333	0.04	-0.000666667
	190	0.072	0.101	0.301333	0.241333	0.065	190	0.0726667	0.0386667	0.128667	0.140667	0.029	190	0.0736667	0.0226667	0.05	0.0783333	0.0156667	190	0.0866667	0.011	0.021	0.048	-0.001
	200	0.073	0.130333	0.345333	0.286	0.0883333	200	0.073	0.0436667	0.132333	0.158667	0.0336667	200	0.0733333	0.023	0.057	0.0906667	0.0163333	200	0.087	0.00933333	0.0293333	0.0576667	-0.00133333
	210	0.073	0.182	0.392333	0.301667	0.118333	210	0.0726667	0.0506667	0.133667	0.173	0.0403333	210	0.0736667	0.026	0.0626667	0.0963333	0.017	210	0.086	0.0126667	0.0346667	0.068	0.000666667
	220	0.073	0.226667	0.440333	0.329333	0.164333	220	0.0723333	0.0553333	0.138	0.177	0.0476667	220	0.0726667	0.0306667	0.069	0.100667	0.019	220	0.0856667	0.0133333	0.0406667	0.0773333	0.00133333
	230	0.072	0.266	0.492	0.367333	0.219667	230	0.073	0.059	0.146333	0.173667	0.0543333	230	0.074	0.035	0.0716667	0.107667	0.0213333	230	0.087	0.0146667	0.0436667	0.0793333	0.002
	240	0.0735	0.3065	0.538833	0.398167	0.2585	240	0.0726667	0.062	0.156	0.165667	0.057	240	0.0736667	0.0396667	0.0703333	0.110333	0.023	240	0.086	0.018	0.048	0.0826667	0.00366667
	250	0.0735	0.346167	0.582833	0.432833	0.298167	250	0.0723333	0.0636667	0.17	0.158	0.057	250	0.0726667	0.043	0.0703333	0.108333	0.0266667	250	0.0853333	0.018	0.05	0.0883333	0.005
	260	0.073	0.401667	0.623667	0.469333	0.343	260	0.073	0.0703333	0.188333	0.155	0.0543333	260	0.0736667	0.045	0.0673333	0.105667	0.03	260	0.0863333	0.0203333	0.0476667	0.086	0.00633333
	270	0.072	0.458	0.658667	0.504667	0.397667	270	0.0733333	0.083	0.213667	0.154	0.057	270	0.074	0.0466667	0.0683333	0.100667	0.0316667	270	0.0866667	0.0226667	0.045	0.0836667	0.00833333
	280	0.072	0.506333	0.684	0.538333	0.449667	280	0.073	0.101	0.243667	0.153333	0.0656667	280	0.074	0.0463333	0.0713333	0.097	0.033	280	0.0863333	0.0236667	0.043	0.0793333	0.00966667
	290	0.0725	0.549167	0.7075	0.574167	0.5005	290	0.073	0.124667	0.276	0.152	0.082	290	0.0736667	0.0456667	0.0763333	0.0933333	0.0326667	290	0.0866667	0.0236667	0.0413333	0.0763333	0.011
	300	0.0725	0.589167	0.7315	0.609833	0.545833	300	0.0726667	0.145667	0.309	0.151	0.107667	300	0.0733333	0.046	0.0856667	0.0916667	0.0316667	300	0.086	0.0246667	0.0426667	0.073	0.0123333
	310	0.073	0.623667	0.749667	0.643	0.583	310	0.0726667	0.174	0.347667	0.150333	0.141667	310	0.0733333	0.0456667	0.0966667	0.088	0.0306667	310	0.086	0.0233333	0.0446667	0.0693333	0.012
	320	0.0725	0.653167	0.771833	0.674833	0.617167	320	0.073	0.198667	0.386333	0.151667	0.165	320	0.0736667	0.0476667	0.109	0.0843333	0.0293333	320	0.0863333	0.0236667	0.049	0.0666667	0.0123333
	330	0.0725	0.676167	0.789167	0.701833	0.649833	330	0.073	0.234667	0.425667	0.154333	0.198667	330	0.0736667	0.052	0.118333	0.0813333	0.0276667	330	0.0866667	0.0226667	0.053	0.0643333	0.0106667
	340	0.073	0.697333	0.806667	0.73	0.677333	340	0.0723333	0.273667	0.466	0.158333	0.235333	340	0.073	0.0593333	0.131667	0.0813333	0.027	340	0.0856667	0.0223333	0.0613333	0.063	0.0103333
	350	0.073	0.712667	0.824667	0.750667	0.701	350	0.0726667	0.315333	0.506	0.164	0.28	350	0.0736667	0.0643333	0.148	0.0816667	0.027	350	0.0856667	0.022	0.0673333	0.0616667	0.00933333
	360	0.0725	0.7285	0.846833	0.771167	0.720833	360	0.073	0.357333	0.545667	0.171333	0.327	360	0.0736667	0.0726667	0.167333	0.082	0.0286667	360	0.0866667	0.021	0.0736667	0.0573333	0.008
	370	0.0725	0.744167	0.8625	0.793167	0.733167	370	0.0723333	0.399333	0.583667	0.182667	0.374667	370	0.073	0.0846667	0.187	0.083	0.0306667	370	0.0856667	0.0223333	0.0836667	0.0576667	0.008
	380	0.072	0.759667	0.882667	0.815	0.747	380	0.0733333	0.435667	0.615	0.195	0.418333	380	0.074	0.0973333	0.202333	0.083	0.0346667	380	0.087	0.022	0.0893333	0.0563333	0.00666667
	390	0.0725	0.776167	0.897833	0.833833	0.759167	390	0.0726667	0.471333	0.645667	0.211	0.462	390	0.0733333	0.113333	0.220333	0.0853333	0.0406667	390	0.0856667	0.024	0.101	0.059	0.00633333
	400	0.0725	0.795167	0.910833	0.852833	0.7795	400	0.0726667	0.503667	0.669	0.227333	0.502667	400	0.0733333	0.129	0.235	0.0866667	0.0483333	400	0.086	0.0266667	0.112667	0.0596667	0.006
	410	0.072	0.815	0.917667	0.871667	0.8	410	0.0733333	0.531333	0.687667	0.246333	0.538	410	0.0736667	0.142333	0.255	0.089	0.0576667	410	0.0863333	0.0306667	0.125333	0.061	0.00566667
	420	0.0725	0.831833	0.9225	0.8865	0.820167	420	0.073	0.556	0.709	0.268667	0.573667	420	0.074	0.157333	0.277667	0.0913333	0.0703333	420	0.086	0.035	0.138667	0.0623333	0.00566667
	430	0.073	0.85	0.927	0.9	0.840333	430	0.0726667	0.580333	0.732667	0.293333	0.606667	430	0.0733333	0.172333	0.303667	0.095	0.0856667	430	0.0856667	0.0423333	0.148667	0.0643333	0.00633333
	440	0.073	0.866333	0.927667	0.910667	0.860667	440	0.0723333	0.603667	0.758667	0.321667	0.635667	440	0.073	0.187	0.331	0.0983333	0.100333	440	0.0856667	0.05	0.158667	0.0656667	0.00666667
	450	0.072	0.882667	0.926	0.924	0.880667	450	0.0726667	0.624333	0.783333	0.356667	0.658333	450	0.0733333	0.205667	0.361	0.101667	0.116	450	0.0856667	0.0603333	0.167667	0.0676667	0.00866667
	460	0.073	0.895	0.925	0.933333	0.899667	460	0.0723333	0.643	0.806	0.392	0.681667	460	0.0723333	0.228667	0.397	0.107	0.130667	460	0.085	0.07	0.177333	0.0703333	0.0103333
	470	0.0725	0.9035	0.9245	0.939167	0.9195	470	0.0723333	0.662667	0.829	0.429	0.703	470	0.073	0.251667	0.430667	0.111	0.152	470	0.0856667	0.081	0.187333	0.072	0.0123333
	480	0.073	0.905667	0.921333	0.941333	0.937	480	0.0723333	0.681667	0.846	0.461667	0.724333	480	0.073	0.273	0.467	0.115667	0.177333	480	0.085	0.0956667	0.199	0.0736667	0.0156667
	490	0.073	0.908	0.922667	0.943333	0.946333	490	0.0736667	0.702	0.863	0.505	0.747667	490	0.074	0.292333	0.502667	0.120333	0.204	490	0.087	0.110333	0.213	0.0746667	0.017
	500	0.072	0.91	0.927	0.943333	0.951	500	0.074	0.724	0.873	0.541333	0.769667	500	0.0746667	0.311333	0.544333	0.126333	0.228333	500	0.087	0.125333	0.230333	0.078	0.021
	510	0.073	0.905333	0.923	0.944	0.95	510	0.0733333	0.740667	0.883	0.577333	0.794667	510	0.074	0.330667	0.582	0.132333	0.247667	510	0.0863333	0.144333	0.251667	0.081	0.0263333
	520	0.073	0.902667	0.922	0.949333	0.946333	520	0.0723333	0.758333	0.884667	0.606333	0.816	520	0.0726667	0.355667	0.607	0.139667	0.265667	520	0.0853333	0.161667	0.273667	0.084	0.0323333
	530	0.073	0.898	0.925333	0.950333	0.944	530	0.0733333	0.774333	0.884333	0.63	0.838	530	0.074	0.379333	0.631667	0.147	0.286333	530	0.0863333	0.179333	0.299333	0.0866667	0.0383333
	540	0.0725	0.896833	0.920833	0.9515	0.939833	540	0.0726667	0.792	0.885	0.653667	0.859	540	0.0733333	0.404	0.66	0.154333	0.310333	540	0.0853333	0.202333	0.330667	0.0903333	0.0433333
	550	0.0725	0.894833	0.9215	0.9515	0.939833	550	0.0736667	0.805333	0.884667	0.674667	0.880333	550	0.0746667	0.432	0.682667	0.163	0.340667	550	0.087	0.222667	0.364667	0.0926667	0.051
	560	0.073	0.889667	0.92	0.961333	0.934333	560	0.0723333	0.816667	0.886333	0.694667	0.899667	560	0.0733333	0.459333	0.702667	0.171667	0.372333	560	0.085	0.244667	0.4	0.097	0.0606667
	570	0.072	0.889333	0.920667	0.962	0.931667	570	0.0736667	0.822333	0.885667	0.713333	0.910667	570	0.0743333	0.487667	0.724	0.182	0.408	570	0.0866667	0.268	0.436333	0.100333	0.0706667
	580	0.073	0.886333	0.919667	0.963333	0.931	580	0.073	0.826	0.886667	0.731333	0.919667	580	0.074	0.517	0.742667	0.193	0.442333	580	0.086	0.293	0.471	0.103	0.0823333
	590	0.0735	0.8835	0.9165	0.969167	0.927833	590	0.0726667	0.829333	0.887333	0.747333	0.924333	590	0.074	0.544667	0.76	0.207333	0.479	590	0.086	0.320667	0.503	0.106667	0.0923333
	600	0.0725	0.885833	0.915833	0.968833	0.9275	600	0.074	0.829	0.887667	0.762333	0.923	600	0.0746667	0.572667	0.775667	0.225	0.513333	600	0.087	0.350667	0.530667	0.110333	0.102667
	610	0.073	0.883333	0.912333	0.966667	0.925333	610	0.073	0.829667	0.888	0.776667	0.922333	610	0.0736667	0.599667	0.792	0.243	0.543333	610	0.086	0.380667	0.554667	0.114333	0.114667
	620	0.073	0.883667	0.909667	0.967667	0.923667	620	0.0733333	0.831333	0.889333	0.791	0.921333	620	0.0736667	0.623667	0.805	0.264333	0.576667	620	0.0856667	0.413667	0.577667	0.119667	0.130333
	630	0.073	0.885333	0.907667	0.969667	0.925333	630	0.0736667	0.832333	0.895667	0.804333	0.923	630	0.0746667	0.648333	0.813333	0.285	0.613	630	0.0866667	0.443667	0.599	0.122667	0.147333
	640	0.0725	0.883167	0.901167	0.962833	0.9235	640	0.073	0.831667	0.896667	0.816333	0.922	640	0.0733333	0.666667	0.815333	0.31	0.646667	640	0.0856667	0.472333	0.619667	0.128333	0.164667
	650	0.074	0.881	0.897333	0.960667	0.922333	650	0.073	0.834	0.900333	0.829	0.922	650	0.0733333	0.683333	0.819667	0.335	0.674	650	0.0856667	0.502	0.639333	0.132	0.185
	660	0.073	0.883667	0.894	0.964333	0.922667	660	0.0726667	0.838667	0.892667	0.838	0.926	660	0.0733333	0.702	0.823	0.364333	0.698667	660	0.085	0.533667	0.658333	0.137667	0.209333
	670	0.0725	0.883833	0.890833	0.9655	0.923167	670	0.0733333	0.839667	0.891	0.844333	0.926	670	0.074	0.715333	0.825	0.393333	0.722667	670	0.0863333	0.553667	0.673	0.144333	0.235333
	680	0.073	0.884	0.887	0.964	0.925	680	0.0736667	0.843667	0.892667	0.847	0.926	680	0.0736667	0.726667	0.828333	0.422333	0.743	680	0.0863333	0.574667	0.688	0.153	0.265667
	690	0.0735	0.882167	0.8785	0.9605	0.924167	690	0.0733333	0.844667	0.897	0.856333	0.928333	690	0.0736667	0.739333	0.830667	0.454333	0.762333	690	0.0856667	0.592333	0.704	0.165	0.294667
	700	0.0735	0.881833	0.871167	0.957167	0.9235	700	0.073	0.851	0.898	0.856333	0.928667	700	0.0733333	0.750333	0.832	0.484667	0.78	700	0.0853333	0.610667	0.719333	0.174667	0.322
	710	0.073	0.883333	0.868333	0.955333	0.924333	710	0.073	0.851	0.896	0.862667	0.931667	710	0.0733333	0.76	0.835333	0.516333	0.798	710	0.0856667	0.630667	0.730333	0.186333	0.347333
	720	0.073	0.88	0.865667	0.955667	0.926	720	0.0736667	0.855667	0.895333	0.867	0.932667	720	0.074	0.771	0.834333	0.545667	0.812667	720	0.086	0.644333	0.738	0.200333	0.376
	730	0.0735	0.8815	0.859167	0.9485	0.923167	730	0.0726667	0.858333	0.893667	0.870667	0.933667	730	0.073	0.785333	0.838333	0.574	0.827333	730	0.085	0.658667	0.751667	0.217667	0.406333
	740	0.0735	0.8765	0.8535	0.942167	0.9225	740	0.0726667	0.862	0.889	0.876667	0.932667	740	0.0736667	0.789667	0.836	0.596667	0.841333	740	0.0853333	0.671333	0.753	0.233333	0.437
	750	0.0725	0.8775	0.845833	0.9395	0.921167	750	0.0733333	0.861	0.890333	0.876	0.932	750	0.0736667	0.792333	0.838333	0.618667	0.851	750	0.0856667	0.679333	0.759	0.253333	0.468
	760	0.0735	0.875833	0.845167	0.936167	0.9215	760	0.0733333	0.865667	0.884667	0.883333	0.936333	760	0.0736667	0.801	0.838	0.639	0.858	760	0.0856667	0.696667	0.762667	0.275	0.500667
	770	0.0735	0.8725	0.835833	0.931167	0.919833	770	0.073	0.868333	0.882333	0.887333	0.935667	770	0.0736667	0.803	0.84	0.659	0.863333	770	0.0853333	0.705667	0.770667	0.297667	0.532333
	780	0.074	0.868667	0.835667	0.922333	0.918667	780	0.0733333	0.870333	0.880333	0.889	0.934667	780	0.0736667	0.803333	0.837333	0.677667	0.865667	780	0.0856667	0.708333	0.767	0.321667	0.564
	790	0.073	0.868333	0.828	0.920667	0.914333	790	0.0736667	0.874	0.872667	0.890333	0.933667	790	0.0743333	0.806333	0.836667	0.693333	0.865333	790	0.0856667	0.718667	0.773667	0.346667	0.594667
	800	0.0735	0.862833	0.829167	0.908167	0.9115	800	0.0736667	0.871333	0.872	0.892667	0.931667	800	0.074	0.809667	0.840333	0.710333	0.870667	800	0.0856667	0.715	0.776	0.373	0.625333
	810	0.073	0.861333	0.825333	0.906667	0.908	810	0.073	0.872333	0.866667	0.895667	0.931333	810	0.0736667	0.812333	0.839667	0.726333	0.870667	810	0.0853333	0.718667	0.777	0.398667	0.652
	820	0.073	0.856667	0.820667	0.894	0.905	820	0.073	0.872	0.866333	0.896333	0.93	820	0.0733333	0.817	0.835	0.741	0.874333	820	0.0853333	0.714333	0.782	0.425667	0.679667
	830	0.073	0.853333	0.814667	0.889	0.903333	830	0.073	0.871	0.871	0.897333	0.931333	830	0.0746667	0.823333	0.838667	0.755	0.876	830	0.0856667	0.714667	0.777667	0.450333	0.703333
	840	0.0725	0.848833	0.809167	0.883167	0.898167	840	0.0736667	0.869333	0.863333	0.900333	0.927667	840	0.0736667	0.821	0.835667	0.768	0.879333	840	0.0853333	0.709	0.782	0.476667	0.722
	850	0.0725	0.8455	0.804833	0.875833	0.897167	850	0.0726667	0.872667	0.863333	0.901333	0.926667	850	0.0736667	0.824	0.840667	0.780333	0.88	850	0.085	0.707667	0.783667	0.503333	0.744333
	860	0.072	0.841667	0.797	0.866667	0.890667	860	0.0733333	0.866	0.853667	0.902	0.923667	860	0.074	0.824	0.835667	0.792	0.881667	860	0.0856667	0.704667	0.782333	0.528333	0.757667
	870	0.0725	0.838167	0.790167	0.8595	0.8875	870	0.073	0.873333	0.854333	0.902667	0.923333	870	0.074	0.824	0.834333	0.803667	0.884667	870	0.0856667	0.705667	0.787	0.553333	0.774333
	880	0.0725	0.834833	0.7835	0.849833	0.881167	880	0.0736667	0.870667	0.851667	0.899333	0.921667	880	0.074	0.827333	0.836	0.812333	0.882667	880	0.0856667	0.703667	0.785333	0.574333	0.786667
	890	0.0725	0.829833	0.781167	0.841167	0.877167	890	0.0733333	0.864333	0.843667	0.900667	0.918667	890	0.0736667	0.848667	0.834333	0.821333	0.884667	890	0.0856667	0.707667	0.791	0.594	0.799333
	900	0.0725	0.824167	0.774167	0.835833	0.8705	900	0.073	0.861	0.838	0.901667	0.915667	900	0.0736667	0.838667	0.834	0.83	0.885333	900	0.0856667	0.706	0.788	0.612	0.807667
	910	0.072	0.822667	0.77	0.826333	0.870667	910	0.0743333	0.858333	0.831667	0.899333	0.913667	910	0.0753333	0.845333	0.834333	0.834667	0.884333	910	0.087	0.704667	0.789	0.628333	0.815333
	920	0.0725	0.8175	0.7645	0.819167	0.864167	920	0.0723333	0.865	0.831333	0.900333	0.912667	920	0.073	0.851667	0.833667	0.838333	0.887667	920	0.0843333	0.711667	0.789333	0.646	0.828667
	930	0.073	0.812667	0.760667	0.811667	0.858333	930	0.073	0.856333	0.825333	0.898333	0.912	930	0.074	0.839333	0.831333	0.840333	0.886667	930	0.0856667	0.709	0.791333	0.661	0.834
	940	0.073	0.807667	0.755333	0.804333	0.851667	940	0.073	0.849333	0.822333	0.895	0.904333	940	0.074	0.834667	0.832	0.841333	0.886333	940	0.0853333	0.714	0.789333	0.676333	0.843
	950	0.0725	0.805833	0.7555	0.7985	0.847167	950	0.0723333	0.848	0.815667	0.892333	0.905	950	0.0733333	0.849667	0.830333	0.843667	0.888333	950	0.085	0.709333	0.789	0.691	0.848
	960	0.0725	0.800167	0.7495	0.789167	0.847167	960	0.0733333	0.843	0.813333	0.89	0.902	960	0.074	0.845333	0.828333	0.845	0.886333	960	0.0856667	0.722	0.787333	0.702667	0.844667
[truncated: 48 more columns]

## Sheet: LB 
Experiment Fosfomycin sensitivity				Date 2019-10-29
Strain:WT, BB003, 3511, 4092																				100-160
Medium:LB, LB Fo10-50									190-260 min exp					210-270min						210-270min
	130-200 min linear
	WT						PBP1						FloAT						PBP1FloAT
	time	OD	ln	µ -1 h-	µ -2 h-		time	OD	ln	µ -1 h-	µ -2 h-		time	OD	ln	µ -1 h-	µ -2 h-		time	OD	ln	µ -1 h-	µ -2 h-
	h			h-1	h-1		h			h-1	h-1		h			h-1	h-1		h			h-1	h-1
	0						3.16667	0.301333					3.5	0.118333					3.5	0.301667
	1.5	0.0153333	0.02	#DIV/0!			3.33333	0.345333	-1.06325	0.817758			3.66667	0.164333	-1.80586	1.97035			3.66667	0.329333	-1.11068	0.526487
	1.66667	0.0193333	0.0253333	1.39081	#DIV/0!		3.5	0.392333	-0.935643	0.76561	0.791684		3.83333	0.219667	-1.51564	1.74129	1.85582		3.83333	0.367333	-1.00149	0.655196	0.590841
	1.83333	0.026	0.0316667	1.77759			3.66667	0.440333	-0.820223	0.692521			4	0.2585	-1.35286	0.976707			4	0.398167	-0.920885	0.483606
	2	0.0366667	0.0436667	2.06263	1.92011		3.83333	0.492	-0.709277	0.66568	0.679101		4.16667	0.298167	-1.2101	0.856542	0.916624		4.16667	0.432833	-0.837403	0.500892	0.492249
	2.16667	0.0511667	0.059	1.99932			4	0.538833	-0.618349	0.545566			4.33333	0.343	-1.07002	0.840467			4.33333	0.469333	-0.756442	0.485763
	2.33333	0.0716667	0.0776667	2.02162	2.01047		4.16667	0.582833	-0.539854	0.47097	0.508268		4.5	0.397667	-0.922141	0.887302	0.863885		4.5	0.504667	-0.683857	0.435509	0.460636
	2.5	0.101	0.105	2.05857			4.33333	0.623667	-0.472139	0.406289			4.66667	0.449667	-0.799249	0.737355			4.66667	0.538333	-0.619277	0.387479
	exp. µ	1.88118	R²				exp. µ	0.63082	R²				exp. µ	1.06633	R²		#REF!		exp. µ	0.506186	R²		#REF!
	exp. phase, h:	1-x	SE				exp. phase, h:	1-x	SE				exp. phase, h:	1-x	SE		#REF!		exp. phase, h:	1-x	SE		#REF!
		contaminated most likely
								140-200min					140-200min						90-150min
							PBP1						FloAT						PBP1FloAT
							time	OD	ln	µ -1 h-	µ -2 h-		time	OD	ln	µ -1 h-	µ -2 h-		time	OD	ln	µ -1 h-	µ -2 h-
							h			h-1	h-1		h			h-1	h-1		h			h-1	h-1
							1.5	0.0923333	-2.38235	#DIV/0!			2.33333	0.017	-4.07454	#DIV/0!			1.5	0.0201667	-3.90372	#DIV/0!
							1.66667	0.118333	-2.13425	1.4886	#DIV/0!		2.5	0.0206667	-3.87923	1.17185	#DIV/0!		1.66667	0.0265	-3.63061	1.63868	#DIV/0!
							1.83333	0.159333	-1.83676	1.78496			2.66667	0.0266667	-3.62434	1.52935			1.83333	0.0336667	-3.39125	1.43618
							2	0.215167	-1.53634	1.80249	1.79372		2.83333	0.0355	-3.33822	1.71671	1.62303		2	0.044	-3.12357	1.60609	1.52113
							2.16667	0.264333	-1.33054	1.23479			3	0.048	-3.03655	1.81001			2.16667	0.0533333	-2.93119	1.15423
							2.33333	0.301333	-1.19954	0.786037	1.01041		3.16667	0.065	-2.73337	1.81912	1.81456		2.33333	0.0736667	-2.6082	1.93793	1.54608
							2.5	0.345333	-1.06325	0.817758			3.33333	0.0883333	-2.42664	1.84038			2.5	0.0983333	-2.31939	1.73288
							exp. µ	1.35706	R²				exp. µ	1.57019	R²		#REF!		exp. µ	1.51603	R²		#REF!
							exp. phase, h:	1-x	SE				exp. phase, h:	1-x	SE		#REF!		exp. phase, h:	1-x	SE		#REF!
									min	h
									10	0.166667
									20	0.333333
									30	0.5
									40	0.666667
									50	0.833333
									60	1
									70	1.16667
									80	1.33333
									90	1.5
									100	1.66667
									110	1.83333
									120	2
									130	2.16667
									140	2.33333
									150	2.5
									160	2.66667
									170	2.83333
									180	3
									190	3.16667
									200	3.33333
									210	3.5
									220	3.66667
									230	3.83333
									240	4
									250	4.16667
									260	4.33333
									270	4.5
									280	4.66667
									290	4.83333
									300	5
									310	5.16667
									320	5.33333
									330	5.5
									340	5.66667
									350	5.83333
										6

## Sheet: LB Fo10
							5
		300-370min						300-370 min					270-340min						400-460 min
	WT						FloAT						PBP1						PBP1FloAT
	time	OD	ln	µ -1 h-	µ -2 h-		time	OD	ln	µ -1 h-	µ -2 h-		time	OD	ln	µ -1 h-	µ -2 h-		time	OD	ln	µ -1 h-	µ -2 h-
	h			h-1	h-1		h			h-1	h-1		h			h-1	h-1		h			h-1	h-1
							5	0.107667					4.5	0.213667					6.66667	0.227333
	5	0.145667	-1.92643	#DIV/0!			5.16667	0.141667	-1.95428	1.64662			4.66667	0.243667	-1.41195	0.788304			6.83333	0.246333	-1.40107	0.48161
	5.16667	0.174	-1.7487	1.06641	#DIV/0!		5.33333	0.165	-1.80181	0.914812	1.28072		4.83333	0.276	-1.28735	0.747598	0.767951		7	0.268667	-1.31428	0.520715	0.501162
	5.33333	0.198667	-1.61613	0.795438			5.5	0.198667	-1.61613	1.1141			5	0.309	-1.17441	0.677642			7.16667	0.293333	-1.22645	0.527029
	5.5	0.234667	-1.44959	0.999226	0.897332		5.66667	0.235333	-1.44675	1.01625	1.06517		5.16667	0.347667	-1.05651	0.707417	0.69253		7.33333	0.321667	-1.13424	0.553237	0.540133
	5.66667	0.273667	-1.29584	0.922469			5.83333	0.28	-1.27297	1.04272			5.33333	0.386333	-0.951055	0.632738			7.5	0.356667	-1.03095	0.619715
	5.83333	0.315333	-1.15412	0.850317	0.886393		6	0.327	-1.1178	0.931023	0.986872		5.5	0.425667	-0.854099	0.581736	0.607237		7.66667	0.392	-0.936493	0.566761	0.593238
	6	0.357333	-1.02909	0.750233			6.16667	0.374667	-0.981719	0.816459			5.66667	0.466	-0.76357	0.543174			7.83333	0.429	-0.846298	0.54117
	exp. µ	0.880769	R²		#REF!		exp. µ	1.018	R²		#REF!		exp. µ	0.671328	R²		#REF!		exp. µ	0.559728	R²		#REF!
	exp. phase, h:	1-x	SE		#REF!		exp. phase, h:	1-x	SE		#REF!		exp. phase, h:		SE		#REF!		exp. phase, h:	1-x	SE		#REF!

## Sheet: Fo25
	70-130min						70-130min						70-130min						70-130min
	WT						FloAT						PBP1						PBP1FloAT
	time	OD	ln	µ -1 h-	µ -2 h-		time	OD	ln	µ -1 h-	µ -2 h-		time	OD	ln	µ -1 h-	µ -2 h-		time	OD	ln	µ -1 h-	µ -2 h-
	h			h-1	h-1		h			h-1	h-1		h			h-1	h-1		h			h-1	h-1
							5	7
	1.16667	0.00666667	-5.01064	#DIV/0!			1.16667	0.00666667	-5.01064	1.81475			1.16667	0.008	-4.82831	#DIV/0!			1.16667	0.0106667	-4.54063	#DIV/0!
	1.33333	0.00733333	-4.91533	0.571861	#DIV/0!		1.33333	0.00666667	-5.01064	-1.26565e-14	1.89724		1.33333	0.00933333	-4.67416	0.924904	#DIV/0!		1.33333	0.0126667	-4.36878	1.0311	#DIV/0!
	1.5	0.007	-4.96185	-0.27912			1.5	0.00733333	-4.91533	0.571861			1.5	0.01	-4.60517	0.413957			1.5	0.013	-4.34281	0.155853
	1.66667	0.00866667	-4.74827	1.28144	0.501162		1.66667	0.008	-4.82831	0.522068	0.546965		1.66667	0.0116667	-4.45102	0.924904	0.669431		1.66667	0.016	-4.13517	1.24584	0.700845
	1.83333	0.00866667	-4.74827	0			1.83333	0.00833333	-4.78749	0.244932			1.83333	0.013	-4.34281	0.649282			1.83333	0.019	-3.96332	1.0311
	2	0.0106667	-4.54063	1.24584	0.622918		2	0.00933333	-4.67416	0.679972	0.462452		2	0.0156667	-4.15622	1.11952	0.884399		2	0.0223333	-3.80167	0.969848	1.00047
	2.16667	0.0126667	-4.36878	1.0311			2.16667	0.01	-4.60517	0.413957			2.16667	0.0173333	-4.05512	0.606577			2.16667	0.026	-3.64966	0.912097
	exp. µ	0.68509	R²		#REF!		exp. µ	0.418081	R²		#REF!		exp. µ	0.772918	R²		#REF!		exp. µ	0.877512	R²		#REF!
	exp. phase, h:	1-x	SE		#REF!		exp. phase, h:	1-x	SE		#REF!		exp. phase, h:		SE		#REF!		exp. phase, h:	1-x	SE		#REF!
	min	h
	10	0.166667
	20	0.333333
	30	0.5
	40	0.666667
	50	0.833333
	60	1
	70	1.16667
	80	1.33333
	90	1.5
	100	1.66667
	110	1.83333
	120	2
	130	2.16667
	140	2.33333
	150	2.5
	160	2.66667
	170	2.83333
	180	3
	190	3.16667
	200	3.33333
	210	3.5
	220	3.66667
	230	3.83333
	240	4
	250	4.16667
	260	4.33333
	270	4.5
	280	4.66667
	290	4.83333
	300	5
	310	5.16667
	320	5.33333
	330	5.5
	340	5.66667
	350	5.83333
		6

## Sheet: summary tables
2019-12-18					µ [h-1]
			medium/strain	WT	Δpbp1	ΔfloAT	Δpbp1ΔfloAT
			LB	1.57	1.55	1.57	1.55
			LB Fo5	0.94	0.91	1.21	1.2
			LB Fo10	1.2	0.72	1.16	0.82
			LB Fo25	0.72	0.4	0.78	0.64
									stdevs
2019-10-29					µ [h-1]						µ [h-1]
			medium/strain	WT	Δpbp1	ΔfloAT	Δpbp1ΔfloAT		medium/strain	WT	Δpbp1	ΔfloAT	Δpbp1ΔfloAT
			LB	1.88	1.87	1.57	1.51		LB	0.219203	0.226274	0	0.0282843
			LB Fo10	0.88	0.67	1.02	0.56		LB Fo10	0.226274	0.0353553	0.0989949	0.183848
			LB Fo25	0.68	0.77	0.42	0.88
										0.183848

## Sheet: Compatibility Report
	Compatibility Report for 2019-10-29 Fosfo 10-50 WT AT pon ponAT (0001).xls
	Run on 14/02/2020 12:30
	If the workbook is saved in an earlier file format or opened in an earlier version of Microsoft Excel, the listed features will not be available.
	Minor loss of fidelity			# of occurrences	Version
	Some cells or styles in this workbook contain formatting that is not supported by the selected file format. These formats will be converted to the closest format available.			6	Excel 97-2003
