# Supplementary material for: Flotillin-mediated membrane fluidity controls peptidoglycan synthesis and MreB movement
Source: eLife. 2020 Jul 14;9:e57179. doi: 10.7554/eLife.57179 (PMC7360373; doi:10.7554/eLife.57179)
Supplement: Figure 1—figure supplement 1—source data 2. [file elife-57179-fig1-figsupp1-data2.xlsx]

## Sheet: F1-FS1B FM4-64
	WT	ΔfloAT
1	275.057	622.967
2	591.302	518.767
3	958.819	483.001
4	442.789	665.545
5	800.277	378.78
6	502.833	1032.52
7	343.412	875.699
8	501.594	422.193
9	713.615	734.112
10	352.107	370.85
11	702	1116.69
12	571.225	360.054
13	767.007	789.483
14	704.425	266.461
15	297.598	645.126
16	578.821	861.692
17	198.669	287.041
18	467.747	329.276
19	776.81	250.868
20	364.49	339.347
21	730.117	555.635
22	437.117	515.046
23	304.464	352.349
24	324.943	348.602
25	685.789	290.887
26	590.187	645.823
27	238.166	526.126
28	700.616	390.809
29	880.566	630.269
30	1182.17	745.028
31	353.715	376.05
32	233.977	613.233
33	528.039	310.023
34	397.813	525.538
35	423.702	738.491
36	358.762	1122.75
37	312.071	900.142
38	483.689	500.615
39	438.417	515.526
40	559.514	653.311
41	592.653	750.612
42	623.767	576.862
43	466.285	515.683
44	331.725	763.371
45	496.563	411.471
46	564.22	734
47	552.554	687.374
48	763.23	891.237
49	524.139	675.434
50	1092.84	898.228
51	265.243	545.117
52	344.351	616.93
53	200.663	552.602
54	661.228	588.154
55	332.772	582.925
56	340.646	649.16
57	217.614	870.668
58	331.759	2177
59	438.854	473.513
60	444.389	872.219
61	214.368	398.365
62	579.065	481.192
63	324.943	441.354
64	389.047	930.771
65	579.065	317.75
66	171.675	745.593
67	451.82	224.312
68	265.939	371.842
69	263.226	219.835
70	412.978	257.811

## Sheet: F1-FS1B.Nile Red
	WT	ΔfloAT
1	13782.1	13066.1
2	11934.4	8338.43
3	5732.35	15542.7
4	10556.3	18490.8
5	10646	14748.9
6	9687.46	12369.5
7	5747.68	15322.3
8	4695.13	9787.93
9	11934.4	10741.2
10	5766	16969.5
11	11679.7	10954.8
12	10888.8	22361.6
13	6153.15	10314.6
14	7050.59	13524.4
15	3616.84	8340.36
16	12020.3	10302.4
17	11449.3	20945
18	14143.9	10239.3
19	6875.99	16830.2
20	8341	10601
21	6139.41	5698.61
22	6094.35	11510.1
23	8477.09	6683.51
24	11371.5	10853.5
25	6395.65	4896
26	12228.5	13831.1
27	3609.51	7541.71
28	6297.68	9483.22
29	6986.83	13229.6
30	6463.1	10045.2
31	8283.69	3921.77
32	7978.64	7287.38
33	4884.51	6560.19
34	6833.73	11729.6
35	8739.81	15840.5
36	10415.7	4228.05
37	11044.1	7783.18
38	8713.09	11636
39	13499.2	10424.2
40	9029.08	17976.2
41	11188	9958.69
42	3825.14	5373.41
43	9001.97	10439.6
44	12339.3	7834.66
45	5957.74	10656.8
46	8969.76	10656.8
47	7823.13	19727.8
48	9750.28	12822.9
49	6789.48	8138.98
50	4643.34	11084.6
51	10186.4	10989.5
52	9252.67	10589.9
53	6071	10476.6
54	5852.75	11413.2
55	12190.9	14299
56	6275.83	17476.7
57	8708.22	11166.2
58	10661.7	18375.8
59	8370.33	5406.24
60	10415.2	9244.91
61	7834.85	11890.1
62	11446	5192
63	6566.89	13406.2
64	8160.76	12707.9
65	12028.9	7834.37
66	7403.38	16659.2
67	7893.22	14024.4
68	5621.75	6955.29
69	9353.22	8404.95
70	4534.26	9838.85

## Sheet: F1-FS1B HADA
	WT	ΔfloAT
1	567.538	1529.37
2	862.66	1156.75
3	1041.19	1132.24
4	1330.18	1717.68
5	3327.54	1132.24
6	678.404	1053.18
7	911.517	1843.51
8	892.192	1820.1
9	873.798	2136.07
10	2513.88	1527.83
11	974.525	3595.18
12	905.614	1138.11
13	670.167	654.59
14	679.244	990.685
15	1560.13	1055.83
16	1001.69	1386.17
17	1291.52	1305.64
18	882.817	1544.48
19	2357.38	2204.62
20	958.615	1669.66
21	2996.38	1401.5
22	1118.96	782.643
23	481.339	1888.38
24	1266.4	1228.38
25	1185.28	1567.4
26	1238.27	685.052
27	1569	1415.85
28	557.655	928.246
29	503.925	828.354
30	1320.34	873.583
31	683.693	1784.34
32	4363.6	2737.64
33	881.487	1148.46
34	1393.81	566.715
35	668.923	1620.36
36	1133.14	701.657
37	626.053	2625
38	465.842	1393.18
39	1119.69	999.151
40	2575.15	829.025
41	1235.86	829.025
42	651.669	2275.84
43	1269.56	737.232
44	1217.33	705.149
45	2540.01	1480.03
46	1005.29	952.722
47	1572.37	1174.93
48	2298.28	1555.18
49	1848.8	1330.89
50	3873.56	795.853
51	1236.57	1673.97
52	1031.74	1274.05
53	650.136	1408.69
54	676.207	1369.17
55	1599.13	1911.37
56	2102.75	1998.15
57	1429.66	1384.16
58	666.24	1438.74
59	2272.53	1490.22
60	611.864	1561.6
61	967.579	2698.44
62	799.241	553.297
63	2933.72	863.483
64	1458.26	1590.32
65	264.496	1499.83
66	798.65	847.611
67	1055.96	965.319
68	1049.43	1373.93
69	669.456	1201.51
70	967.579	419.478

## Sheet: F1-FS1C EM septa thickness
	WT	ΔfloAT
1	20.5	23.2
2	29.4	18.3
3	17	22.7
4	32.2	20.1
5	24.5	23
6	28.5	18.1
7	28.1	25.9
8	27.5	24.9
9	28.1	47.7
10	23.4	28.7
11	34.8	23.7
12	19.9	25.2
13	21.6	27
14	18.9	19.4
15	27.1	23.4
16	25.5	26.3
17	29	24.5
18	21.4	21.4
19	17.8	28.6
20	31.1	21.2
21	32.6	23.1
22	24.2	29.5
23	22.3	28.7
24	18.4	23.5
25	25.7	25.1
26	27.7	26.7
27	30.8	28.1
28	17.5	23.8
29	16.7	22.1
30	19.1	21.7
31	14.2	22.7
32	19.6	20.2
33	34.9	20.9
34	18.1	24.4
35	14.9	16.5
36	24.1	21
37	24.1	21.9
38	18.7	19.1
39	19.4	20.9
40	22.8	23.1
41	27	23.5
42	25.2	21.9
43	26.5	21.5
44	30.8	35.6
45	19.4	22.8
46	18.5	17.3
47	22.1	24.7
48	15.9	21.3
49	22.9	16.6
50	26.3	21.4
51	18.6	22.7
52	15.6	21.6
53	21.7	26.1
54	17.5	15.9
55	19.1	19.5
56	14.8	24.5
57	25.6	20.1
58	12.2	20.8
59	15.7	18.9
60	13.7	20.6
61	19.6	22.5
62	23.4	25.2
63	19.9	33.2
64	19.5	30.1
65	29	27.2
66	24.1	19.1
67	15.9	31.2
68	20.2	21.8
69	14.1	18.2
70	9.5	31.4
