# Supplementary material for: Flotillin-mediated membrane fluidity controls peptidoglycan synthesis and MreB movement
Source: eLife. 2020 Jul 14;9:e57179. doi: 10.7554/eLife.57179 (PMC7360373; doi:10.7554/eLife.57179)
Supplement: Figure 1—source data 1. [file elife-57179-fig1-data1.xlsx]

## Sheet: F1 B. HADA 
	WT	ΔfloAT
1	1394	658
2	4251	1815
3	8852	1318
4	341	937
5	1058	3383
6	1276	988
7	4358	3103
8	1657	912
9	5402	8890
10	6846	19983
11	3337	1983
12	99	3413
13	7034	12893
14	1249	1204
15	1527	9779
16	3201	23818
17	3702	3016
18	5575	933
19	1075	799
20	1046	1209
21	5269	29313
22	716	20765
23	5091	5324
24	4646	1722
25	1362	1112
26	529	22518
27	815	2171
28	1042	2141
29	3769	1811
30	6455	2088
31	7242	1697
32	5156	11418
33	2148	1028
34	3454	6427
35	368	1923
36	543	4114
37	5062	18650
38	2304	25995
39	3143	1053
40	3150	19828
41	3803	17646
42	1348	2147
43	3121	749
44	321	824
45	4165	10063
46	6757	22765
47	988	13064
48	7567	14985
49	3973	15612
50	671	22705
51	424	24349
52	926	1542
53	6383	1937
54	363	6225
55	3469	8792
56	2421	1976
57	4854	10922
58	503	9815
59	4231	19876
60	193	16620
61	480	3041
62	1627	7923
63	5999	23569
64	1942	16463
65	1689	9381
66	258	14637
67	186	15657
68	10034	16453
69	12069	9414
70	699	981
71	3138	1474
72	1556	22580
73	758	1099
74	3927	10034
75	3151	1664
76	215	12771
77	10403	9317
78	645	2979
79	581	23414
80	468	17211
81	1666	6510
82	556	8694
83	1337	623
84	5051	3153
85	1240	936
86	690	16485
87	5854	2571
88	2039	613
89	6102	14484
90	797	1102
91	3497	6814
92	3178	1003
93	1121	2687
94	4013	1788
95	2697	3289
96	4753	1220
97	668	773
98	1698	9813
99	1769	1501
100	679	2239

## Sheet: F1 C. Van-FL
	WT	ΔfloAT
1	2535.69	6000.19
2	1419.42	3019.74
3	1578.37	11321
4	2091.18	5283.09
5	1506.81	5820
6	6005.86	4721.83
7	3377.16	10072.4
8	2556.79	7417.7
9	1409.19	5410.86
10	3772.53	1496.23
11	2931.18	1448.43
12	682.84	2498.86
13	2497.35	11818
14	3962.03	3072.32
15	2753.37	1855.77
16	3517.7	5135.83
17	1025.35	4557
18	1342.71	11562.4
19	948.21	1309.05
20	3315.57	3001.34
21	1035.05	3098.86
22	2239.27	3035
23	2301.86	10647.4
24	3468.82	10257
25	623.87	7333.27
26	3661.67	3697.57
27	246.68	2039.51
28	409.26	6817.14
29	248.83	7894.52
30	805.93	6358.07
31	1627.09	3479.72
32	1392.08	3587.18
33	697.14	3131.12
34	1659.81	3614.7
35	2436.4	5646.89
36	5700.84	4471.73
37	687.59	3892.68
38	3089.91	2759.95
39	2695.95	1888.95
40	1447.4	8160.48
41	2251.06	5110.78
42	692.12	3110.55
43	1258.67	2275.26
44	1068.61	4146.36
45	2100.62	2079.96
46	548.67	2002.24
47	1844.84	4759.95
48	833.69	4287.15
49	848.78	5032.82
50	1232.36	6800.39
51	1997.19	6437.67
52	1629.19	4094.08
53	1371.34	3283.35
54	4541.2	5378.51
55	655.44	4184.57
56	1270.07	4275.54
57	618.43	10020.3
58	718.43	7954.79
59	954.47	4802.76
60	1387.13	5462.34
61	795.01	7380.33
62	4976	6884.27
63	2630.8	3885.47
64	1102.6	3749.25
65	677.43	4093.75
66	2603.31	6169.9
67	2807.42	3540.82
68	3472.45	5346.11
69	987.09	5436.82
70	1268.85	6148.09
71	2246.9	12606.9
72	2327.74	6437.93
73	2147.61	5364.32
74	634.92	5178.84
75	4108.3	2002.19
76	2240.55	6623.76
77	4963.34	3107
78	1008.38	2860.15
79	2215.6	2583.65
80	3129.13	2597.72
81	5051.29	2218.92
82	2843.49	2202.39
83	1146.4	3961.18
84	2900.19	4367.26
85	881.18	5109
86	890.74	2049.61
87	2406.5	2695.81
88	1788.24	2393.51
89	2804.41	4099.95
90	1824.05	2333.52
91	5705.3	3794.5
92	2253.23	4510.35
93	2539.16	2003.88
94	3569.06	2462.35
95	4004.12	4129.59
96	1824.94	2712
97	2746.36	2837.27
98	4512.68	4096.89
99	4226.5	3940.04
100	1130.36	4140.19

## Sheet: F1 D. FM4-64
	WT	ΔfloAT
1	3581.18	13504.7
2	827.6	5297
3	3152.23	16140
4	2553.44	11708.9
5	3786.35	5864.78
6	4239.14	4364.64
7	2231.81	3546.01
8	2803.12	6443.93
9	4092.78	7095.28
10	3663.94	7237.95
11	1531.65	5608.72
12	2757.62	9667.22
13	2015.48	8090.05
14	3712.61	11607.7
15	1759.01	9069.13
16	2820.37	8370.47
17	1950.27	11272
18	2255.42	5760.62
19	2866.59	2948
20	3147.05	5646.08
21	4597.15	5106.64
22	3629.14	7058.21
23	5798.41	1900.08
24	2420.94	3694.25
25	6179.92	5538.51
26	2776.7	7175.27
27	2470.42	9264.24
28	3322.35	11926.2
29	1383.21	7198.34
30	2689.19	8036.58
31	2844.69	3765.42
32	2843.35	4184.75
33	2927.73	3878.42
34	575.86	4912.91
35	1505.32	7358.09
36	5453.38	5758.99
37	4274.48	6118.14
38	4257.95	8403
39	1873.05	5373.13
40	2036.97	5589
41	1338.43	4593.46
42	3649.1	7200.45
43	1697.09	8935.92
44	2195.44	8187.62
45	2324.84	9032.58
46	1321.04	5583.6
47	5509.93	7979.98
48	2728.09	6379.44
49	3397.12	5913.01
50	2168.73	5179.63
51	3241.41	7028.24
52	3702	5663.79
53	3637.83	7541
54	2357	9636.59
55	3621.01	12738.3
56	2886	11333
57	2431.9	5595.57
58	2372.93	6010.43
59	6068	3910
60	2774	9022
61	4486.81	5732.61
62	6527	5515.32
63	2301.38	8358.15
64	4604.05	5514.17
65	4305.38	5887.52
66	3821	6834.2
67	2907	8209.23
68	1714.38	9184.8
69	2057.9	9956.76
70	3334	3759
71	2700.2	9821.13
72	6414.14	3376
73	3284.04	5221
74	3622.87	6354.46
75	2529.08	6460.43
76	4004.77	17879.9
77	2835.03	7152.1
78	2834	7269.38
79	1742.67	10108.4
80	5689	7116.57
81	2048.59	13747.4
82	2607.55	6724.85
83	2416.35	9646.02
84	1959.49	4388
85	2140.14	15132.5
86	3016.09	4899.85
87	3034.15	9935
88	3769.2	10973.5
89	3188.29	7741.32
90	2726.86	8742.73
91	2577.32	7939.37
92	5662.96	9971
93	3597.56	15762
94	3473.41	3534
95	3377.97	4188.5
96	2358.41	7606
97	6551.57	5017
98	2839.84	9821
99	3002.57	6398
100	3812.65	13818

## Sheet: F1 E. Nile Red
	WT	ΔfloAT
1	9034.01	11068.8
2	11727.1	15801.1
3	17188.3	10845
4	8081.69	19951.2
5	3973.03	13089.8
6	12510.6	19602.6
7	12450.4	15801.1
8	16949.5	9854.43
9	4454.79	22649.2
10	1603.49	15813.6
11	11026.9	12228.7
12	14542.8	10136.3
13	7479.25	15043.1
14	12230.3	14444.4
15	17479.7	14368.4
16	3377	9330.29
17	14718.3	10286.1
18	5585.25	23473.2
19	3367.06	15676.9
20	16840.2	2195.04
21	6165.8	18123.5
22	12417.1	20083.8
23	14230	27468.9
24	12265.2	14067.6
25	13192	13820.4
26	12166.1	12208.6
27	8815.92	9836.04
28	50	28553.6
29	6776.65	19649.1
30	37204.5	16785.4
31	14777.3	13206
32	10906.2	15858.9
33	8834.21	15113
34	15568.8	23429
35	15267.8	26499.6
36	15307.3	16971.8
37	7238.84	21747.3
38	43243.3	15754.5
39	15167.7	37848.3
40	15315.7	16319.2
41	16231.8	10215.5
42	17059.6	19249.3
43	28632	22474.4
44	15531	26824.1
45	17736	20100.2
46	4256.04	14712.7
47	6731.52	12809.8
48	34785	12364.7
49	12745	14435.5
50	22363.2	22433
51	18109	15314.5
52	17270.8	17705
53	22267	11066.9
54	6443.79	11920.8
55	20036.6	18472.7
56	6388.91	30644.9
57	16353	12776.4
58	14427	9336.35
59	33796.3	5904.09
60	4364.84	14306.7

## Sheet: F1 F. Dil-C12
	WT	ΔfloAT
1	14376.5	15513.5
2	13263.6	14846.1
3	13429.4	14595.8
4	15346.8	14968.7
5	12792	14002.5
6	13652.3	15307.4
7	12332.9	12204
8	14647.8	15613.2
9	14303.5	14100.4
10	15722.2	13677.5
11	12948.7	13296.4
12	13699.6	13754
13	13121.5	16015.4
14	12048	13931.7
15	12576	14628.3
16	15056.8	12129.9
17	14585.2	12712
18	14506.7	12712
19	15192.5	12708.6
20	14421	12950.5
21	11368.7	16097.5
22	11169.5	16221.4
23	11169.5	16383
24	13771.5	12086.4
25	15941.4	11100.1
26	11155.3	11823.1
27	13232.2	12275
28	13245.1	13440
29	14366.5	14277.2
30	12310.3	12156.3
31	13247.2	11885.2
32	13847.9	12755.5
33	14669.9	11059.7
34	15548.1	11159.6
35	12965.1	11555.4
36	15703.2	12308.4
37	13906.6	13792.7
38	10580.3	12625.9
39	11265	16096.9
40	10684.9	14029.6
41	12410.8	15302.9
42	10117.9	11989.3
43	9270.5	15077.3
44	13870.4	12486.4
45	14194.7	12690.7
46	14596.5	11770.5
47	10849.3	12713.2
48	13222.4	14749.7
49	14901.3	15510.5
50	12496.9	12306.3
51	13615.9	11765.2
52	13768.5	11016
53	13953.3	12653.8
54	12990.9	11358.9
55	12615	12269.8
56	12562.8	11328
57	13360.6	11432
58	11603.6	11656.3
59	11014.6	12432
60	13676.8	14672
61	12595.5	12170.2
62	14349.2	12170.2
63	12082.9	11112
64	14700.7	13144.2
65	15800	11296.2
66	15679.6	10397.7
67	14899.8	13447.2
68	10970.8	11702.1
69	10662	11339.3
70	11199.9	14779.5
71	11402.2	12184
72	10865.1	14814
73	12054.5	14813.4
74	12063.4	14453.2
75	13104	14735.4
76	13185.8	14807.2
77	10666.4	11296.5
78	11325.1	11112.4
79	11580.1	13866.9
80	11676.4	15105.9
81	14342.5	11335.7
82	10800.9	15130
83	11871.6	14061.4
84	13612.4	11514.1
85	14958.4	15181.2
86	13422.5	11251.9
87	10288	15489.3
88	14666.8	14795.1
89	14162.3	14340.1
90	13978.4	12000.2
91	12990.5	16326
92	14852.3	11416
93	11003.8	11416
94	11820.2	16383
95	11369.8	11469
96	14216.2	11289.6
97	14147.9	16315.9
98	12093.5	16193.8
99	11748.1	16209.2
100	11656.6	16383
101	11145.2	16383
102	10129.2	16383
103	10085.5	16383
104	10964.6	16383
105	10726.5	16383
106	10358.4	16378.4

## Sheet: F1 G. cell length
2018-11-28	WT	ΔfloAT
1	3.7186	8.2526
2	7.6441	2.5507
3	11.0699	13.2262
4	6.4681	9.9182
5	4.2156	17.5173
6	2.823	6.8263
7	4.1548	8.5617
8	4.662	7.4856
9	5.0806	2.9088
10	3.1639	1.857
11	6.0832	6.8048
12	7.3314	17.6698
13	4.7191	10.9055
14	2.7482	2.0874
15	5.9205	9.0317
16	4.7604	6.4106
17	2.8738	4.1502
18	6.8007	11.7083
19	10.5352	12.4087
20	9.6285	5.046
21	6.4746	10.8952
22	3.9048	3.4447
23	5.8008	9.9831
24	4.1577	16.7289
25	3.3889	9.4939
26	5.1169	4.6338
27	6.731	3.0313
28	4.2515	11.2557
29	2.4298	4.212
30	7.3555	9.6966
31	5.8525	13.6182
32	4.2305	9.2252
33	5.7753	9.7603
34	4.0806	3.0748
35	5.8716	3.0267
36	3.0293	10.9172
37	3.5259	8.5096
38	5.0579	2.2282
39	2.9392	8.4362
40	6.0849	2.4624
41	6.4761	9.2928
42	4.4752	8.6532
43	3.7143	2.398
44	4.7811	1.9106
45	5.6916	8.7167
46	2.9457	2.4152
47	4.6347	4.7731
48	4.4393	2.5783
49	4.7069	4.9908
50	3.7115	7.4189
51	2.9313	5.0774
52	4.2049	3.9041
53	6.9127	2.7561
54	5.7799	2.4877
55	5.0632	16.1728
56	3.391	6.3691
57	4.3755	3.6202
58	5.913	2.7046
59	7.2	11.604
60	5.3691	8.7065
61	5.228	2.7334
62	2.1848	4.1383
63	2.9716	3.5741
64	4.0942	9.384
65	4.5473	2.8083
66	4.6651	6.1479
67	4.3764	3.3269
68	6.2593	2.797
69	3.7628	18.7897
70	2.1415	12.6928
71	3.8594	15.1841
72	6.3668	6.3779
73	2.8224	25.8505
74	5.6346	12.1288
75	7.979	13.7947
76	3.2287	12.9044
77	4.4814	8.0813
78	5.954	12.6465
79	9.4665	11.3662
80	3.7649	3.4682
81	5.4798	15.7042
82	3.7867	11.5312
83	2.634	3.9639
84	3.7743	8.6204
85	5.6582	9.3805
86	5.3666	14.798
87	9.8621	6.1095
88	4.0695	9.25
89	4.1387	3.4883
90	7.2965	8.5241
91	5.1145	8.1546
92	5.0801	9.2876
93	4.3876	9.7355
94	4.3451	10.6862
95	7.0001	15.4275
96	3.3399	13.3241
97	6.0565	11.8795
98	3.7801	9.6101
99	5.6481	4.2302
100	6.2265	6.5707
