# Supplementary material for: Flotillin-mediated membrane fluidity controls peptidoglycan synthesis and MreB movement
Source: eLife. 2020 Jul 14;9:e57179. doi: 10.7554/eLife.57179 (PMC7360373; doi:10.7554/eLife.57179)
Supplement: Figure 2—figure supplement 1—source data 1. [file elife-57179-fig2-figsupp1-data1.xlsx]

## Sheet: F2-FS1C cell lengths
	WT	Δpbp1	Δpbp1ΔfloA	Δpbp1ΔfloT
1	6.0853	5.5569	5.4588	2.5544
2	5.3477	4.5866	5.7647	1.9432
3	4.0235	5.4247	5.6922	7.6442
4	3.4759	6.0072	6.9443	4.1516
5	5.8236	4.3822	5.9312	4.0792
6	2.8224	4.0991	7.3029	2.5858
7	4.048	3.6284	10.1492	5.5688
8	4.8905	3.8496	3.2712	2.4002
9	5.5196	2.7346	6.0333	4.6603
10	4.994	2.4918	5.5501	3.4543
11	3.6144	3.7071	6.2939	4.3314
12	3.9043	4.6004	4.3766	4.5462
13	7.0569	3.3773	8.3745	4.8137
14	4.8163	5.4113	4.3367	4.0772
15	3.324	3.7691	4.9598	5.1896
16	4.124	4.0645	5.2867	4.5091
17	6.1322	5.919	4.0296	3.3932
18	7.2214	5.1262	6.4534	3.8175
19	1.7864	4.8353	4.1293	4.9025
20	4.1302	3.6965	7.2336	3.5992
21	4.4096	6.2777	5.3077	3.5873
22	7.5515	4.2772	5.1162	5.4749
23	5.3036	4.0729	4.4913	5.0344
24	3.9607	5.3964	7.354	3.5487
25	5.188	4.6269	8.3379	4.4969
26	5.3987	1.8392	6.8202	7.1826
27	5.0788	5.886	5.509	6.7493
28	3.525	7.9992	10.1219	8.4095
29	5.5883	8.4891	5.9422	5.4973
30	4.6869	7.3517	4.1007	4.4403
31	6.6799	6.4972	4.8942	3.6498
32	2.8442	4.7217	5.9564	4.7123
33	3.9886	5.0791	8.5777	3.9058
34	5.4158	6.8498	7.4699	3.2928
35	4.0374	3.5442	4.6606	3.5152
36	3.9121	7.6483	12.115	4.0382
37	6.4363	5.1079	7.7002	3.4466
38	7.8792	3.3924	3.9955	4.7733
39	3.9358	5.6401	10.303	3.3705
40	5.8421	4.8212	9.1752	4.4406
41	4.2098	3.1747	8.131	6.1688
42	3.7085	3.8386	4.3178	6.1005
43	4.3576	3.6113	4.9115	3.263
44	4.7191	4.2371	7.8419	6.479
45	4.1209	5.4007	4.568	1.6616
46	8.7188	5.8862	8.1582	4.0739
47	5.9343	3.2855	10.0662	4.5446
48	4.066	3.6651	10.252	3.8267
49	3.4822	3.0321	5.8764	7.614
50	2.9875	8.4672	6.6219	3.6891
51	5.5601	3.3437	4.2826	3.3934
52	5.354	3.3733	3.2159	4.4631
53	4.6038	5.5155	5.5638	11.6501
54	4.3666	3.6128	7.7661	4.7594
55	6.1667	3.3019	7.0408	3.3454
56	6.7629	7.3281	7.5619	4.9526
57	5.444	3.1942	5.1043	4.0132
58	4.3994	3.7294	7.2622	3.4911
59	4.8224	5.6187	5.6717	5.9444
60	3.5293	4.6633	5.5311	5.8933
61	3.0283	9.3889	6.2561	5.2783
62	5.4666	4.4812	7.6042	6.0186
63	7.504	4.2023	4.469	5.3898
64	10.237	5.3069	2.1545	4.8877
65	6.7386	2.9338	4.9751	5.3728
66	6.7265	4.9405	8.2302	3.707
67	6.1642	4.8498	6.2137	4.6818
68	3.5539	7.1586	3.9603	5.3696
69	5.2541	9.2414	6.2612	5.9576
70	4.3687	4.3444	4.9268	3.5345
71	5.6414	6.4456	6.1454	4.4447
72	9.9654	6.1137	4.3402	4.9796
73	4.7686	8.0156	6.8595	4.8624
74	3.6192	4.5506	7.2085	3.9448
75	5.746	4.9004	4.5402	3.1238
76	5.7545	6.8188	6.7272	6.9047
77	3.7182	4.6656	5.4104	11.1683
78	6.6203	2.8382	8.6348	5.2634
79	4.4239	4.0369	8.0107	3.5113
80	4.6089	7.2466	5.1732	5.3876
81	7.1292	2.8545	4.279	4.5005
82	4.0556	4.8068	6.6892	22.6664
83	4.9682	2.9035	3.5504	7.2975
84	4.9746	4.3858	4.4249	2.8315
85	3.7936	1.8513	4.7697	4.0661
86	7.514	4.1744	4.5944	4.675
87	6.0644	4.4082	5.539	3.8676
88	7.5358	8.4359	6.7292	4.1498
89	4.0849	3.6206	3.8891	4.8685
90	5.7508	4.0063	4.6543	2.4641
91	4.3742	4.2509	5.4105	5.6977
92	3.9698	6.7057	3.9335	8.4427
93	3.2939	3.1734	3.6345	4.0492
94	2.3384	4.8639	5.53097	2.509
95	4.0397	3.0201	5.51929	5.5261
96	3.6992	5.8183	5.5076	10.464
97	3.6292	3.7373	5.49591	2.7611
98	3.5082	5.7544	5.48423	5.7354
99	7.0617	6.6974	5.47254	8.6295
100	5.473	2.9622	5.46085	3.4493
