# Supplementary material for: Flotillin-mediated membrane fluidity controls peptidoglycan synthesis and MreB movement
Source: eLife. 2020 Jul 14;9:e57179. doi: 10.7554/eLife.57179 (PMC7360373; doi:10.7554/eLife.57179)
Supplement: Figure 2—figure supplement 2—source data 1. [file elife-57179-fig2-figsupp2-data1.xlsx]

## Sheet: F2FS2B Van-FL
	WT	ΔfloAT
1	190.035	217.034
2	210.856	354
3	84.894	202.662
4	431.113	219.396
5	419.633	311
6	201.556	137.849
7	407.359	322.146
8	355.62	317.486
9	387.02	326.973
10	218.868	209.007
11	95.998	272.251
12	203.931	250.343
13	235.008	336.997
14	263.176	147.332
15	277.679	132.054
16	313.038	206.671
17	315.061	151.124
18	294.922	147.566
19	319.957	267.736
20	322.081	177.943
21	313.284	240.081
22	297.819	296.393
23	135.243	206.897
24	295.047	190.634
25	328.077	185.084
26	316.991	249.029
27	354.252	173.313
28	218.125	197.469
29	318.521	198.834
30	120.941	136.309
31	209.365	165.03
32	246.335	119.298
33	168.921	261.926
34	164.64	126.46
35	188.004	153.257
36	197.738	240.517
37	343.607	284.801
38	372.561	202.859
39	214.129	324.843
40	167	274.584
41	259.894	173.033
42	157.28	298.476
43	122.923	130.006
44	164.291	340.85
45	226.97	328.953
46	263.107	268.629
47	390.524	180
48	130.37	148.868
49	211.379	229.73
50	347.452	373.7

## Sheet: F2FS2D Nile Red
	WT	ΔfloAT
1	3823.81	805.06
2	2646.34	4087.39
3	6308.22	4870.08
4	6483.42	4826.46
5	6214.36	4096.7
6	6675.77	3834.27
7	4115.63	4514.25
8	2817.58	2979.78
9	5989.23	3050.04
10	5206.79	3823.81
11	4870.74	2676.57
12	7475.81	3482.36
13	7451.45	2305.88
14	8611.83	2823.74
15	6389.41	2809.83
16	5743	1946.57
17	7493.05	3259.76
18	6667.89	3453.1
19	8724.22	2852.04
20	6111.43	3322.06
21	6949.01	2532.68
22	5516.86	3494.36
23	8360.14	3798.51
24	10525.2	4021.49
25	5651.69	5074.77
26	11471	4314.66
27	2828.01	3475.04
28	6465	4286.27
29	6246.03	4331.9
30	7564.75	3846.59
31	3156.07	7203.27
32	5501.33	4461.69
33	9017.15	2537.28
34	10085.2	3824.52
35	9079.4	4048.71
36	10234.3	3319.22
37	9946.18	3475.72
38	12162.2	4486.57
39	10181.8	4095.27
40	11889.4	5396.78
41	6680.93	5430.74
42	7082.81	6115.57
43	7082.81	4118.16
44	7757.17	1691
45	8738.96	4401.35
46	6298.9	5955.19
47	7244.45	1921.98
48	7041.3	3101.55
49	8513.96	3824.82
50	6368.03	5346.36
