# Supplementary material for: Flotillin-mediated membrane fluidity controls peptidoglycan synthesis and MreB movement
Source: eLife. 2020 Jul 14;9:e57179. doi: 10.7554/eLife.57179 (PMC7360373; doi:10.7554/eLife.57179)
Supplement: Figure 2—figure supplement 4—source data 1. [file elife-57179-fig2-figsupp4-data1.xlsx]

## Sheet: Figure 2 - figure supplement 4
LB					LB + 1% BnOH
time (h)	WT				time (h)	WT
0	0.1	0.12	0.1		0	0.1	0.1	0.1
1	0.29	0.34	0.27		1	0.26	0.25	0.27
2	1.25	1.3	1.27		2	1.18	1.23	1.33
3	1.93	2.3	2.76		3	1.75	2.31	2.11
4	3.1	2.87	3.27		4	2.78	3.3	2.61
5	3.96	3.24	3.4		5	3.84	3.64	3.36
6	3.24	3.81	3.59		6	3.21	3.41	3.39
7	3.24	3.75	3.44		7	3.96	3.37	3.2
time (h)	ΔfloA				time (h)	ΔfloA
0	0.09	0.11	0.15		0	0.06	0.11	0.06
1	0.5	0.47	0.4		1	0.42	0.45	0.32
2	1.69	1.75	1.56		2	1.53	1.57	1.66
3	2.82	2.89	2.75		3	2.37	2.42	2.56
4	3.55	3.57	3.5		4	3.53	3.6	2.75
5	3.67	3.67	3.67		5	3.54	3.63	3.89
6	3.24	3.89	3.55		6	3.16	3.23	3.33
7	2.83	2.9	3.12		7	2.54	2.67	2.77
time (h)	ΔfloT				time (h)	ΔfloT
0	0.1	0.1	0.1		0	0.1	0.1	0.1
1	0.49	0.53	0.57		1	0.35	0.42	0.3
2	1.81	1.9	1.77		2	1.47	1.65	1.4
3	2.77	2.6	2.62		3	2.14	2.23	2.03
4	3.4	3.5	3.56		4	3.17	3.26	3.16
5	3.89	3.93	3.86		5	3.43	3.53	3.68
6	3.33	3.42	3.22		6	3.1	3.12	3.25
7	3.07	2.99	3.16		7	2.88	2.98	3.06
time (h)	ΔfloAT				time (h)	ΔfloAT
0	0.06	0.1	0.1		0	0.07	0.1	0.1
1	0.38	0.42	0.35		1	0.36	0.38	0.41
2	1.53	1.56	1.47		2	1.52	1.55	1.56
3	2.36	3.46	2.31		3	2.52	2.56	2.59
4	3.51	3.58	3.49		4	3.31	3.36	3.42
5	3.52	3.65	3.66		5	3.58	3.62	3.65
6	3.06	3.13	3.01		6	3.39	3.43	3.55
7	2.83	2.9	2.85		7	2.96	2.98	3.12
time (h)	Δpbp1				time (h)	Δpbp1
0	0.1	0.1	0.12		0	0.1	0.1	0.1
1	0.26	0.3	0.28		1	0.28	0.33	0.3
2	1.03	1.2	1.1		2	1.04	1.19	1.1
3	1.9	2.2	2		3	1.9	1.74	1.82
4	2.94	2.83	2.88		4	2.3	2.54	2.42
5	3.79	3.87	3.84		5	3.23	3.66	3.41
6	4.2	4.17	4.1		6	3.77	3.73	3.72
7	4.41	4.62	4.52		7	4.48	4.65	4.55
time (h)	Δpbp1ΔfloA				time (h)	Δpbp1ΔfloA
0	0.09	0.1	0.1		0	0.1	0.1	0.1
1	0.21	0.23	0.29		1	0.32	0.42	0.35
2	0.89	0.99	0.87		2	0.68	0.75	0.72
3	1.12	1.25	1.18		3	1.15	1.23	1.22
4	2	2.21	2.16		4	1.68	1.73	1.65
5	2.8	3.01	2.92		5	2.26	2.3	2.27
6	3.49	3.53	3.45		6	2.47	2.56	2.75
7	3.57	3.42	3.51		7	2.89	3.01	2.73
time (h)	Δpbp1ΔfloT				time (h)	Δpbp1ΔfloT
0	0.08	0.08	0.11		0	0.07	0.1	0.1
1	0.32	0.35	0.42		1	0.23	0.28	0.32
2	1.05	1.12	1.09		2	0.68	0.75	0.72
3	1.55	1.52	1.59		3	1.14	1.26	1.25
4	2.38	2.46	2.89		4	1.76	1.85	1.82
5	2.45	3.56	3.47		5	2.28	2.39	2.43
6	2.75	3.13	2.99		6	2.57	2.62	2.57
7	2.73	2.96	2.86		7	2.89	2.75	3.01
time (h)	Δpbp1ΔfloAT				time (h)	Δpbp1ΔfloAT
0	0.1	0.1	0.1		0	0.1	0.1	0.1
1	0.32	0.33	0.35		1	0.28	0.29	0.32
2	0.74	1.05	1.12		2	0.85	1.01	1.03
3	0.91	1.69	1.9		3	1.13	1.46	1.61
4	1.06	2.13	2.19		4	1.42	1.92	1.9
5	1.45	2.48	2.37		5	2	2.27	2.32
6	1.48	2.79	2.76		6	2.35	2.43	2.98
7	1.67	2.63	2.83		7	2.7	2.6	2.8
