# Supplementary material for: Flotillin-mediated membrane fluidity controls peptidoglycan synthesis and MreB movement
Source: eLife. 2020 Jul 14;9:e57179. doi: 10.7554/eLife.57179 (PMC7360373; doi:10.7554/eLife.57179)
Supplement: Figure 2—source data 1. [file elife-57179-fig2-data1.xlsx]

## Sheet: Figure 2A
WT	floAT	pbp1	pbp1floAT
3.785	3.448	3.117	10.57
5.16	4.377	2.79	5.808
4.944	2.618	3.029	6.409
5.152	3.084	2.969	6.166
3.256	3.711	3.284	12.58
4.692	3.478	3.163	17.959
5.47	5.036	3.375	9.46
5.04	8.661	3.075	14.485
5.015	3.51	3.293	9.051
3.165	3.308	3.118	10.446
2.557	5.221	2.469	6.888
2.699	6.036	2.451	14.304
3.346	5.196	3.084	6.093
5.779	5.415	3.268	9.286
2.687	3.218	3.323	11.878
2.27	3.425	2.78	6.664
4.853	3.121	3.122	13.648
4.44	3.053	3.173	9.227
3.467	2.645	3.224	10.72
2.969	3.668	3.059	9.91
2.843	3.479	4.134	11.811
3.372	3.976	4.171	15.276
3.385	3.954	3.091	10.266
3.651	3.276	3.096	11.913
3.13	3.577	3.503	11.942
2.924	3.398	3.729	6.041
3.292	4.295	3.105	2.612
3.048	3.806	3.638	2.41
2.733	3.619	2.577	5.455
4.443	3.524	2.55	5.573
3.444	2.352	2.29	6.571
3.004	3.167	3.039	6.148
3.527	4.76	3.005	13.437
4.053	3.276	3.086	6.312
5.059	2.413	3.631	4.079
2.495	2.971	3.594	4.7
3.964	2.32	3.196	2.28
4.454	3.618	3.59	3.12
3.393	3.428	3.558	11.203
4.16	2.673	4.674	4.571
3.862	3.571	4.721	3.743
5.622	4.289	4.41	14.041
4.164	2.863	3.399	6.643
2.649	4.698	3.197	5.66
5.091	2.959	3.957	5.925
5.78	2.009	2.622	6.623
3.483	3.645	2.671	15.438
3.427	2.942	2.684	9.345
4.255	3.284	2.482	8.038
4.654	3.307	3.44	11.628
3.662	4.789	2.95	6.482
4.015	3.618	2.994	7.289
3.457	3.317	1.638	6.725
3.971	1.721	3.936	13.328
4.52	2.326	3.835	11.993
4.489	3.246	2.948	10.324
4.587	4.01	3.039	9.556
4.325	4.744	3.593	16.138
4.403	3.244	3.754	4.698
2.962	3.741	3.225	5.126
3.054	3.694	3.555	9.108
3.172	3.871	3.756	6.884
3.01	3.241	4.086	12.318
2.965	3.445	3.717	7.699
2.859	4.561	4	6.63
4.683	5.033	4.63	7.342
3.34	2.809	2.646	2.982
3.617	2.471	3.006	3.347
4.623	2.827	2.372	5.839
4.6	2.87	2.307	8.692
2.859	3.202	3.864	6.696
2.89	3.521	3.641	7.975
5.861	2.567	3.776	10.879
5.6	2.451	4.214	7.817
4.005	2.705	3.697	11.13
3.839	2.589	3.314	11.103
3.526	3.407	2.754	11.074
3.621	3.761	2.77	11.954
4.878	1.725	2.489	11.174
5.246	1.89	4.275	7.155
3.251	3.342	2.885	7.92
3.286	4.284	2.844	8.476
3.149	2.418	2.88	6.376
3.192	2.497	3.307	13.906
4.129	2.979	3.847	8.828
3.865	2.744	3.459	8.836
4.172	8.212	3.212	4.59
3.425	2.841	3.751	3.424
4.489	2.596	3.789	7.31
4.552	2.924	3.131	6.716
4.248	3.07	4.743	7.496
4.012	2.532	3.876	7.353
2.632	2.465	3.381	8.894
3.862	4.706	3.172	10.402
3.862	5.215	4.749	9.88
3.577	3.102	5.676	6.595
3.45	2.699	5.423	21.365
3.444	2.749	5.426	19.132
2.924	2.541	4.664	9.176
2.985	4.227	3.777	20.02
	4.564	3.775	11.684
	3.169	2.821	8.61
	3.354	3.318
	2.361	2.659
	2.404	3.079
	5.025	3.176
	4.421	3.337
		4.774

## Sheet: Figure 2B
WT	floAT	pbp1	pbp1floAT
4.179	2.215	1.888	3.797
4.997	2.746	2.323	4.862
3.544	3.665	3.328	2.622
3.934	2.452	4.243	3.46
6.219	2.705	1.607	5.615
3.005	2.269	1.82	3.271
3.727	3.258	4.615	4.102
4.504	2.089	2.331	1.973
4.452	2.415	2.207	4.086
3.611	2.488	3.18	1.596
3.869	2.535	1.24	2.401
3.254	3.088	2.694	3.588
3.643	5.426	3.226	4.255
3.098	3.363	3.765	3.466
4.022	2.694	2.936	2.526
3.402	2.718	2.767	3.438
3.009	2.542	2.754	3.784
2.805	1.994	2.12	3.025
4.19	2.653	1.59	2.478
2.656	3.196	2.095	2.191
3.096	2.545	1.933	3.133
3.969	2.404	2.589	3.094
3.778	2.478	3.882	2.949
4.2	3.181	2.98	4.342
3.784	3.22	2.613	3.942
3.253	2.72	2.448	2.252
2.802	3.536	2.369	2.613
3.718	2.701	3.827	2.917
4.399	2.041	7.127	3.617
3.633	3.09	3.672	3.549
3.076	2.418	2.293	4.416
3.381	2.577	2.443	3.563
4.291	2.247	4.207	3.167
3.152	3.597	2.292	3.285
4.29	3.933	2.339	1.937
3.991	4.33	4.495	3.361
3.562	2.73	3.597	2.42
3.056	2.52	2.773	3.297
3.505	2.783	4.026	3.016
3.792	4.013	1.935	2.943
3.036	2.625	2.841	3.995
3.066	2.114	1.757	2.277
4.326	2.199	2.328	2.695
4.46	1.956	2.119	6.163
4.57	2.923	4.29	3.781
3.987	2.744	3.067	3.01
3.899	2.223	2.389	4.278
4.675	2.616	5.065	2.62
3.915	2.551	2.693	3.876
3.781	3.239	2.576	3.008
3.587	2.716	1.059	3.231
2.738	3.07	2.589	2.895
4.455	3.411	1.694	4.016
3.747	2.329	1.742	1.634
2.742	2.588	3.043	4.2
3.375	2.631	2.1	2.031
3.948	2.674	2.293	4.122
2.513	1.941	3.662	2.659
3.678	1.992	5.01	4.743
2.885	2.842	2.249	2.687
3.017	2.963	3.384	2.635
3.404	4.315	1.896	2.681
4.332	2.347	2.699	3.11
2.815	2.59	3.671	4.332
3.566	2.068	1.91	2.737
2.75	2.022	4.018	3.099
3.162	2.355	2.309	6.646
4.879	2.165	2.457	2.39
2.381	3.381	2.209	2.26
1.772	3.378	2.158	2.315
3.09	2.67	3.064	1.946
4.123	2.333	4.061	3.361
3.277	2.705	2.552	4.081
3.106	3.484	3.967	3.722
3.069	3.206	2.678	3.552
2.847	1.775	1.744	3.478
2.881	3.938	3.09	2.551
2.034	1.384	2.275	3.674
2.302	5.693	1.996	2.88
4.164	4.989	3.748	3.911
2.883	2.286	2.482	6.137
2.243	3.319	3.092	3.171
3.473	3.48	3.163	2.681
2.137	2.607	2.99	2.892
6.266	2.446	2.24	4.419
2.378	1.977	2.405	2.312
2.261	1.76	2.654	3.091
2.067	2.077	2.147	2.791
2.136	2.198	3.4	1.949
2.817	2.334	2.007	3.438
2.431	1.727	3.388	2.264
2.439	2.196	3.503	2.28
2.566	5.919	3.833	4.677
2.493	2.1	2.861	3.918
4.053	2.585	2.462	4.816
3.351	1.913	2.448	2.412
3.067	1.768	3.725	4.615
3.01	1.954	2.821	3.33
1.524	1.877	3.23	4.744
3.984	1.92	2.202	4.147
4.163		3.609	2.391
4.353		4.838	4.078
2.465		4.309	2.775
2.242		4.154	3.92
4.341		2.934	3.741
2.462		2.465	2.192
3.051		2.035	1.572
3.169		1.854	1.125
2.381		3.183	3.838
2.626		3.573	2.871
2.402		2.739	3.873
2.662		3.092	4.969
2.587		2.607	2.087
2.252		3.889	2.94
3.413		1.898	4.484
2.648		3.186	2.709
3.44		2.14	2.36
3.367		4.157	2.159
2.842		3.411	1.709
2.343		2.528	2.453
2.766		2.548	1.811
2.264		3.229	2.084
1.931		3.285	2.573
3.135		2.392	3.959
2.469		2.487	3.084
2.305		3.167	2.704
2.308		2.003	2.794
2.208		2.19	4.992
2.413		2.329	2.997
2.462		2.413	2.709
4.241		1.719	3.692
2.704		2.306	3.582
3.41		4.642	3.104
		5.932	6.444
		3.313	5.333
		3.853	3.75
		2.16	3.009
		2.294	3.105
		1.931	2.226
		2.408	4.68
		1.406	2.388
		1.595	2.888
		2.13	2.422
		2.106	2.345
		2.505	1.864
		2.596	2.341
		1.972	2.115
		2.07	0.949
		2.389	2.426
		1.552	3.485
		1.691	4.435
		3.011	2.458
		2.984	2.077
		2.185	4.118
		1.42	6.26
		1.664	2.733
		2.18	2.839
		2.255	2.143
		1.556	4.416
		2.013	2.31
		1.615	3.868
		1.819	4.348
		2.283	2.111
		3.558	1.649
		2.988	2.34
		1.658	2.077
		2.087	2.536
		1.497	2.616
		1.877	8.308
			2.239
			2.969
			3.14
			3.514
			4.458
			4.382
			2.867
			4.331
			3.991
			2.975
			1.993
			1.764

## Sheet: Figure 2C
WT	floAT	pbp1	pbp1floAT
2.921	3.355	2.235	3.488
3.459	3.691	1.733	2.785
2.616	3.808	2.509	2.829
2.507	2.97	2.558	4.093
2.839	2.838	2.421	1.714
2.512	2.261	2.563	3.429
4.103	2.394	4.929	3.737
4.043	5.046	3.515	2.345
3.165	3.571	3.186	2.065
2.678	3.618	2.659	3.56
2.764	5.06	2.61	3.851
2.243	4.506	3.701	3.645
3.07	2.973	4.939	2.899
2.557	3.191	2.97	5.341
4.692	3.317	3.33	3.519
5.32	3.235	2.993	5.104
3.213	3.52	3.113	2.761
3.021	2.75	3.435	3.345
2.864	2.434	2.368	2.67
3.01	2.791	2.257	2.366
3.408	2.75	3.623	9.843
3.213	2.348	3.938	2.679
3.674	2.812	2.97	4.585
3.043	4.608	2.51	3.583
3.651	2.144	2.71	2.826
3.251	2.516	3.984	10.504
2.847	3.509	4.67	2.6
2.655	3.571	1.737	4.051
3.275	3.713	1.504	4.197
3.874	2.988	2.954	3.256
3.788	2.635	2.489	2.984
4.5	2.659	2.755	3.877
3.922	3.083	2.834	4.065
2.91	2.863	2.973	6.797
2.985	3.235	2.968	2.566
2.891	2.942	2.106	3.248
3.34	3.012	1.847	7.721
3.713	3.087	3.596	6.908
3.372	3.418	3.722	5.941
5.363	3.615	4.36	3.139
3.808	3.965	3.872	3.361
4.088	4.443	3.507	1.875
3.478	4.04	3	2.228
2.992	3.571	3.107	1.569
3.116	3.04	4.369	1.33
3.116	2.959	4.263	1.952
2.982	2.379	2.176	2.452
3.502	2.828	2.593	2.061
4.75	2.701	2.77	2.387
5.708	2.812	3.087	3.626
3.269	2.932	2.326	3.544
3.211	2.512	3.34	2.25
4.301	2.78	3.998	3.829
4.578	2.874	3.012	7.017
2.743	2.934	2.743	2.777
2.939	2.465	4.015	4.37
3.88	2.408	2.633	3.765
4.001	2.206	2.519	2.905
3.079	4.242	2.648	5.518
2.929	2.827	5.428	3.506
3.699	3.213	4.7	2.33
3.543	2.954	2.065	2.909
3.284	3.295	2.007	3.072
2.464	2.92	2.925	2.888
2.507	3.153	2.96	4.597
2.593	4.394	2.1	5.668
2.632	4.963	2.003	4.609
2.655	2.4	2.239	6.342
3.508	2.39	1.966	6.196
3.886	4.192	3.33	3.509
5.515	2.512	2.202	3.21
4.737	2.362	2.197	6.001
4.903	2.776	4.276	2.136
4.647	2.666	5.581	3.719
2.672	3.904	3.562	1.848
2.891	3.256	3.099	3.202
3.681	2.701	2.657	4.09
3.699	2.421	3.355	5.524
3.625	2.92	2.71	7.859
3.461	2.701	2.481	5.364
2.91	3.981	2.973	4.963
2.874	4.428	2.539	3.021
3.228	5.081	3.496	4.238
3.088	3.184	3.808	2.758
3.039	2.903	3.315	4.662
2.885	3.722	3.347	4.48
4.043	4.125	4.242	4.648
3.529	4.086	3.864	1.784
3.358	3.051	3.773	1.628
2.581	3.16	3.367	4.92
3.53	4.382	2.761	3.28
3.273	3.529	2.97	2.326
2.1	3.345	4.232	2.338
2.577	3.254	4.026	3.651
3.397	3.89	2.39	3.613
	5.291	2.4	1.86
	3.203	2.258	2.791
	3.345	2.676	1.884
	2.28	2.552	6.755
	2.193	2.659	3.491
	3.33	4.024	3.393
	4.051	3.797	1.789
		2.394	3.289
		2.839	5.679
		2.253	6.906
		2.204	1.905
			1.272
			2.992
			3.184
			4.647
			3.66
			3.336
			2.13
