# Supplementary material for: Flotillin-mediated membrane fluidity controls peptidoglycan synthesis and MreB movement
Source: eLife. 2020 Jul 14;9:e57179. doi: 10.7554/eLife.57179 (PMC7360373; doi:10.7554/eLife.57179)
Supplement: Figure 3—figure supplement 1—source data 1. [file elife-57179-fig3-figsupp1-data1.xlsx]

## Sheet: F3FS1B LB fatty acid analysis
	LB-1					LB-2					LB average					LB standard dev
	FATTY ACID	wt	ΔfloAT	ΔponAΔfloAT		FATTY ACID	wt	ΔfloAT	ΔponAΔfloAT		FATTY ACID	wt	ΔfloAT	ΔponAΔfloAT		FATTY ACID	wt	ΔfloAT	ΔponAΔfloAT
	14:0 iso	1.65	1.32	2.14		14:0 iso	1.55	1.22	1.46		14:0 iso	1.6	1.27	1.8		14:0 iso	0.0707107	0.0707107	0.480833
	15:0 iso	20.04	20.01	21.96		15:0 iso	20.47	19.94	16.17		15:0 iso	20.255	19.975	19.065		15:0 iso	0.304056	0.0494975	4.09415
	15:0 anteiso	37.58	37.46	33.58		15:0 anteiso	38.66	39.28	39.69		15:0 anteiso	38.12	38.37	36.635		15:0 anteiso	0.763675	1.28693	4.32042
	16:0 iso	5.34	4.65	6.91		16:0 iso	5.31	4.16	4.95		16:0 iso	5.325	4.405	5.93		16:0 iso	0.0212132	0.346482	1.38593
	16;0	6	5.62	5.36		16;0	4.91	4.95	7.14		16;0	5.455	5.285	6.25		16;0	0.770746	0.473762	1.25865
	17:0 iso	12.36	13.31	15.56		17:0 iso	13.26	13.71	12.91		17:0 iso	12.81	13.51	14.235		17:0 iso	0.636396	0.282843	1.87383
	17:0 anteiso	13.17	14.08	11.92		17:0 anteiso	13.63	14.51	15.51		17:0 anteiso	13.4	14.295	13.715		17:0 anteiso	0.325269	0.304056	2.53851
	summary [%]	96.14	96.45	97.43		summary [%]	97.79	97.77	97.83
	C17/C15	0.443075	0.476596	0.494779		C17/C15	0.454761	0.476528	0.508772		C17/C15	0.448918	0.476562	0.501775		C17/C15	0.00826281	4.82849e-05	0.00989482
	iso/anteiso	0.776158	0.762321	1.02352		iso/anteiso	0.776248	0.7256	0.642935		iso/anteiso	0.776203	0.74396	0.833226		iso/anteiso	6.37903e-05	0.0259656	0.269112
	c17/c15			iso/anteiso
	wt	ΔfloAT	ΔponAΔfloAT	wt	ΔfloAT	ΔponAΔfloAT
average	0.448918	0.476562	0.501775	0.776203	0.74396	0.833226
stdev	0.00826281	4.82849e-05	0.00989482	6.37903e-05	0.0259656	0.269112

## Sheet: F3FS1D SMM fatty acid analysis
	SMM-1					SMM-2					SMM average						SMM standard deviation
	FATTY ACID	wt	ΔfloAT	ΔponAΔfloAT		FATTY ACID	wt	ΔfloAT	ΔponAΔfloAT		FATTY ACID	wt	ΔfloAT	ΔponAΔfloAT			FATTY ACID	wt	ΔfloAT	ΔponAΔfloAT
	14:0 iso	2.48	2.55	3.4		14:0 iso	2.71	3.69	3.19		14:0 iso	2.595	3.12	3.295			14:0 iso	0.162635	0.806102	0.148492
	15:0 iso	21.63	20.66	12.19		15:0 iso	17.31	22.7	10.49		15:0 iso	19.47	21.68	11.34			15:0 iso	3.0547	1.4425	1.20208
	15:0 anteiso	38.71	39.01	37.99		15:0 anteiso	41.32	37.42	39.95		15:0 anteiso	40.015	38.215	38.97			15:0 anteiso	1.84555	1.1243	1.38593
	16:0 iso	8.63	9.1	13.51		16:0 iso	9.79	10.46	13.78		16:0 iso	9.21	9.78	13.645			16:0 iso	0.820244	0.961665	0.190919
	16;0	2.57	2.38	2.54		16;0	2.59	2.42	2.46		16;0	2.58	2.4	2.5			16;0	0.0141421	0.0282843	0.0565685
	17:0 iso	10.78	10.61	10.65		17:0 iso	9.19	9.86	9.66		17:0 iso	9.985	10.235	10.155			17:0 iso	1.1243	0.53033	0.700036
	17:0 anteiso	14.36	14.89	17.76		17:0 anteiso	16.9	13.06	19.62		17:0 anteiso	15.63	13.975	18.69			17:0 anteiso	1.79605	1.29401	1.31522
	summary [%]	99.16	99.2	98.04		summary [%]	99.81	99.61	99.15
	C17/C15	0.416639	0.42735	0.566162		C17/C15	0.444994	0.381238	0.580492		C17/C15	0.430817	0.404294	0.573327			C17/C15	0.02005	0.0326067	0.0101327
	iso/anteiso	0.820049	0.796289	0.713004		iso/anteiso	0.669873	0.925317	0.623132		iso/anteiso	0.744961	0.860803	0.668068			iso/anteiso	0.106191	0.0912362	0.0635491
	c17/c15			iso/anteiso
	wt	ΔfloAT	ΔponAΔfloAT	wt	ΔfloAT	ΔponAΔfloAT
average	0.430817	0.404294	0.573327	0.744961	0.860803	0.668068
stdev	0.02005	0.0326067	0.0101327	0.106191	0.0912362	0.0635491
