# Supplementary material for: Flotillin-mediated membrane fluidity controls peptidoglycan synthesis and MreB movement
Source: eLife. 2020 Jul 14;9:e57179. doi: 10.7554/eLife.57179 (PMC7360373; doi:10.7554/eLife.57179)
Supplement: Figure 3—source data 1. [file elife-57179-fig3-data1.xlsx]

## Sheet: Figure 3A
WT	floAT	pbp1	pbp1floAfloT
0.08	0.411	0.293	0.651
0.103	0.561	0.342	0.654
0.293	0.416	0.291	0.674
0.253	0.454	0.289	0.528
0.216	0.565	0.35	0.599
0.146	0.554	0.288	0.584
0.241	0.492	0.293	0.587
0.206	0.502	0.232	0.576
0.335	0.415	0.383	0.543
0.323	0.44	0.326	0.477
0.155	0.574	0.302	0.538
0.251	0.633	0.319	0.602
0.26	0.627	0.43	0.584
0.313	0.563	0.268	0.67
0.236	0.537	0.297	0.594
0.23	0.556	0.232	0.63
0.268	0.548	0.32	0.564
0.267	0.616	0.313	0.595
0.286	0.567	0.343	0.486
0.312	0.623	0.312	0.587
0.313	0.609	0.44	0.638
0.32	0.368	0.332	0.587
0.273	0.453	0.401	0.56
0.282	0.457	0.347	0.666
0.268	0.381	0.248	0.613
0.279	0.431	0.301	0.554
0.269	0.589	0.271	0.566
0.194	0.559	0.281	0.59
0.177	0.591	0.378	0.597
0.359	0.554	0.363	0.627
0.234	0.586	0.296	0.64
0.163	0.448	0.264	0.615
0.288	0.516	0.304	0.604
0.247	0.469	0.27	0.627
0.329	0.469	0.262	0.626
0.307	0.445	0.285	0.649
0.164	0.593	0.276	0.677
0.177	0.637	0.303	0.613
0.314	0.644	0.304	0.61
0.28	0.61	0.345	0.654
0.349	0.477	0.301	0.62
0.298	0.505	0.281	0.591
0.216	0.639	0.349	0.614
0.072	0.554	0.291	0.684
0.197	0.557	0.305	0.685
0.27	0.602	0.296	0.694
0.316	0.628	0.341	0.574
0.334	0.528	0.306	0.623
0.357	0.557	0.292	0.634
0.269	0.576	0.243	0.667
0.3	0.586	0.334	0.671
0.21	0.602	0.417	0.653
0.243	0.503	0.282	0.602
0.266	0.529	0.288	0.507
0.316	0.491	0.271	0.665
0.213	0.505	0.36	0.64
0.331	0.494	0.337	0.633
0.291	0.461	0.271	0.62
0.256	0.58	0.3	0.481
0.27	0.551	0.359	0.614
0.241	0.563	0.404	0.595
0.185	0.557	0.523	0.63
0.255	0.606	0.478	0.715
0.264	0.619	0.452	0.59
0.272	0.585	0.41	0.65
0.291	0.602	0.387	0.633
0.307	0.636	0.424	0.459
0.296	0.655	0.354	0.602
0.199	0.658	0.362	0.71
0.187	0.618	0.383	0.509
0.307	0.639	0.334	0.691
0.287	0.71	0.33	0.655
0.349	0.582	0.297	0.652
0.356	0.706	0.393	0.668
0.304	0.705	0.394	0.669
0.33	0.693	0.388	0.607
0.264	0.634	0.369	0.621
0.272	0.559	0.36	0.721
0.219	0.593	0.397	0.733
0.188	0.659	0.41	0.737
0.206	0.671	0.407	0.744
0.209	0.509	0.343	0.71
0.251	0.63	0.467	0.676
0.244	0.621	0.363	0.648
0.113	0.613	0.383	0.67
0.136	0.62	0.38	0.699
0.311	0.636	0.304	0.69
0.227	0.659	0.422	0.65
0.264	0.639	0.366	0.658
0.348	0.519	0.374	0.725
0.243	0.679	0.382	0.734
0.224	0.626	0.429	0.599
0.298	0.667	0.396	0.705
0.333	0.605	0.557	0.7
0.328	0.631	0.34	0.694
0.277	0.666	0.497	0.716
0.337	0.602	0.329	0.668
0.342	0.58	0.343	0.693
0.302	0.627	0.396	0.683
0.341	0.506	0.352	0.699
0.279		0.381	0.684
0.165		0.289	0.591
0.259		0.307	0.701
		0.514	0.668
		0.398	0.642
		0.38
		0.352
		0.329
		0.358
		0.374
		0.35
		0.408

## Sheet: Figure 3B
WT	floAT	pbp1	pbp1floAfloT
0.451	0.508	0.396	0.33
0.415	0.539	0.397	0.44
0.451	0.501	0.411	0.4
0.45	0.456	0.409	0.5
0.445	0.567	0.448	0.45
0.46	0.525	0.439	0.51
0.462	0.407	0.455	0.46
0.478	0.46	0.485	0.49
0.439	0.575	0.471	0.41
0.501	0.472	0.397	0.39
0.456	0.355	0.471	0.5
0.468	0.457	0.524	0.5
0.417	0.525	0.468	0.52
0.4	0.522	0.444	0.5
0.441	0.562	0.488	0.53
0.448	0.578	0.451	0.5
0.422	0.595	0.482	0.58
0.385	0.486	0.49	0.53
0.409	0.485	0.583	0.65
0.383	0.511	0.521	0.61
0.444	0.409	0.528	0.51
0.463	0.569	0.456	0.63
0.433	0.566	0.414	0.53
0.447	0.383	0.524	0.57
0.416	0.467	0.545	0.59
0.433	0.561	0.449	0.57
0.442	0.586	0.514	0.53
0.431	0.594	0.523	0.44
0.51	0.499	0.541	0.59
0.447	0.519	0.51	0.58
0.505	0.588	0.546	0.53
0.54	0.588	0.519	0.46
0.586	0.624	0.435	0.57
0.524	0.526	0.55	0.45
0.573	0.608	0.517	0.55
0.531	0.562	0.535	0.53
0.535	0.645	0.568	0.65
0.562	0.601	0.535	0.57
0.609	0.322	0.611	0.64
0.624	0.299	0.302	0.47
0.617	0.403	0.363	0.53
0.622	0.401	0.359	0.55
0.598	0.349	0.344	0.59
0.597	0.343	0.406	0.6
0.59	0.385	0.368	0.52
0.599	0.384	0.583	0.6
0.607	0.369	0.571	0.57
0.635	0.404	0.573	0.48
0.562	0.478	0.528	0.56
0.593	0.395	0.504	0.6
0.579	0.307	0.473	0.53
0.588	0.307	0.528	0.53
0.601	0.421	0.515	0.57
0.597	0.37	0.532	0.59
0.566	0.382	0.571	0.55
0.587	0.375	0.57	0.61
0.568	0.41	0.551	0.56
0.554	0.426	0.543	0.61
0.531	0.399	0.523	0.6
0.407	0.482	0.516	0.64
0.377	0.441	0.417	0.62
0.427	0.454	0.491	0.54
0.436	0.435	0.436	0.57
0.431	0.377	0.367	0.66
0.509	0.368	0.507	0.44
0.594	0.389	0.598	0.65
0.557	0.359	0.43	0.6
0.443	0.361	0.372	0.54
0.463	0.489	0.371	0.68
0.451	0.37	0.388	0.57
0.443	0.356	0.529	0.56
0.463	0.346	0.562	0.58
0.472	0.448	0.522	0.54
0.391	0.43	0.343	0.54
0.415	0.531	0.478	0.58
0.409	0.492	0.552	0.58
0.418	0.475	0.523	0.64
0.458	0.454	0.542	0.61
0.631	0.513	0.47	0.63
0.637	0.512	0.533	0.58
0.514	0.485	0.554	0.53
0.499	0.527	0.543	0.51
0.556	0.509	0.577	0.58
0.538	0.519	0.473	0.51
0.553	0.456	0.533	0.62
0.619	0.48	0.407	0.61
0.594	0.551	0.495	0.62
0.517	0.526	0.398	0.38
0.607	0.51	0.444	0.47
0.595	0.655	0.422	0.5
0.623	0.612	0.506	0.4
0.55	0.472	0.546	0.54
0.567	0.497	0.546	0.59
0.582	0.553	0.572	0.56
0.532	0.601	0.398	0.43
0.547	0.477	0.448	0.39
0.54	0.428	0.409	0.37
0.601	0.466	0.465	0.52
0.62	0.531	0.307	0.58
0.587		0.407	0.54

## Sheet: Figure 3C
WT	floAT	pbp1	pbp1floAfloT
-0.444	-0.375	-0.515	-0.402
-0.391	-0.424	-0.461	-0.46
-0.406	-0.448	-0.449	-0.439
-0.404	-0.484	-0.449	-0.391
-0.429	-0.44	-0.43	-0.4
-0.423	-0.389	-0.433	-0.378
-0.456	-0.402	-0.43	-0.405
-0.459	-0.372	-0.432	-0.356
-0.45	-0.384	-0.446	-0.329
-0.457	-0.328	-0.375	-0.401
-0.456	-0.329	-0.413	-0.384
-0.386	-0.351	-0.379	-0.405
-0.413	-0.453	-0.404	-0.409
-0.42	-0.471	-0.386	-0.428
-0.436	-0.42	-0.392	-0.382
-0.405	-0.493	-0.386	-0.34
-0.4	-0.411	-0.391	-0.403
-0.456	-0.447	-0.398	-0.439
-0.435	-0.423	-0.426	-0.376
-0.434	-0.441	-0.417	-0.431
-0.473	-0.406	-0.393	-0.401
-0.471	-0.439	-0.424	-0.391
-0.452	-0.462	-0.396	-0.387
-0.459	-0.47	-0.391	-0.393
-0.471	-0.49	-0.386	-0.32
-0.527	-0.442	-0.44	-0.416
-0.491	-0.431	-0.435	-0.357
-0.47	-0.456	-0.397	-0.351
-0.492	-0.464	-0.511	-0.354
-0.482	-0.444	-0.5	-0.3
-0.466	-0.468	-0.461	-0.359
-0.475	-0.442	-0.356	-0.313
-0.473	-0.354	-0.455	-0.368
-0.469	-0.377	-0.438	-0.33
-0.453	-0.388	-0.443	-0.341
-0.479	-0.352	-0.365	-0.315
-0.468	-0.397	-0.417	-0.35
-0.469	-0.419	-0.398	-0.371
-0.464	-0.466	-0.425	-0.357
-0.496	-0.406	-0.404	-0.4
-0.496	-0.406	-0.416	-0.357
-0.525	-0.42	-0.391	-0.309
-0.498	-0.403	-0.394	-0.331
-0.478	-0.403	-0.389	-0.315
-0.442	-0.448	-0.409	-0.318
-0.496	-0.388	-0.45	-0.302
-0.428	-0.403	-0.452	-0.279
-0.466	-0.401	-0.435	-0.287
-0.463	-0.363	-0.409	-0.296
-0.441	-0.385	-0.436	-0.239
-0.446	-0.399	-0.425	-0.271
-0.45	-0.397	-0.392	-0.297
-0.443	-0.449	-0.37	-0.354
-0.48	-0.486	-0.393	-0.313
-0.49	-0.494	-0.438	-0.289
-0.455	-0.429	-0.422	-0.302
-0.475	-0.384	-0.424	-0.382
-0.516	-0.475	-0.448	-0.384
-0.522	-0.448	-0.41	-0.378
-0.531	-0.535	-0.366	-0.413
-0.502	-0.51	-0.449	-0.323
-0.497	-0.484	-0.345	-0.319
-0.454	-0.465	-0.427	-0.361
-0.457	-0.466	-0.447	-0.346
-0.488	-0.51	-0.456	-0.376
-0.465	-0.501	-0.452	-0.322
-0.464	-0.439	-0.455	-0.368
-0.45	-0.365	-0.417	-0.368
-0.409	-0.379	-0.407	-0.376
-0.486	-0.406	-0.429	-0.402
-0.476	-0.378	-0.416	-0.403
-0.45	-0.403	-0.46	-0.407
-0.453	-0.413	-0.452	-0.378
-0.319	-0.376	-0.424	-0.383
-0.276	-0.411	-0.428	-0.367
-0.469	-0.276	-0.446	-0.406
-0.374	-0.287	-0.404	-0.336
-0.377	-0.333	-0.399	-0.308
-0.321	-0.386	-0.399	-0.409
-0.417	-0.399	-0.429	-0.388
-0.412	-0.382	-0.409	-0.344
-0.425	-0.407	-0.402	-0.406
-0.375	-0.409	-0.46	-0.385
-0.48	-0.399	-0.433	-0.304
-0.404	-0.422	-0.436	-0.329
-0.324	-0.437	-0.449	-0.338
-0.33	-0.403	-0.5	-0.387
-0.378	-0.429	-0.471	-0.383
-0.381	-0.48	-0.528	-0.333
-0.478	-0.438	-0.511	-0.295
-0.349	-0.428	-0.506	-0.32
-0.333	-0.477	-0.419	-0.289
-0.345	-0.468	-0.392	-0.311
-0.351	-0.459	-0.418	-0.286
-0.311	-0.419	-0.481	-0.267
-0.342	-0.387	-0.458	-0.356
-0.342	-0.434	-0.632	-0.355
-0.284	-0.414	-0.359	-0.32
-0.389	-0.423	-0.421	-0.335
-0.375	-0.434	-0.449	-0.356
-0.362	-0.468	-0.486	-0.364
-0.271	-0.443	-0.429	-0.334
-0.314	-0.403	-0.441	-0.339
-0.299	-0.346	-0.417	-0.336
-0.252	-0.378		-0.372
-0.356	-0.41		-0.359
-0.341	-0.346		-0.362
-0.304	-0.369		-0.369
-0.366	-0.397		-0.388
-0.348	-0.43		-0.387
-0.407	-0.442		-0.376
-0.378	-0.415		-0.412
-0.388	-0.469		-0.309
-0.367	-0.478		-0.368
-0.39	-0.384		-0.399
-0.368	-0.424		-0.407
-0.354	-0.407		-0.356
-0.321	-0.434		-0.337
-0.29	-0.409		-0.309
-0.308	-0.438		-0.395
-0.32	-0.39		-0.379
-0.359	-0.403		-0.264
-0.284	-0.392
-0.284	-0.37
-0.341	-0.497
-0.322	-0.507
-0.213	-0.456
-0.419	-0.437
-0.332
