# Supplementary material for: Flotillin-mediated membrane fluidity controls peptidoglycan synthesis and MreB movement
Source: eLife. 2020 Jul 14;9:e57179. doi: 10.7554/eLife.57179 (PMC7360373; doi:10.7554/eLife.57179)
Supplement: Figure 4—source data 1. [file elife-57179-fig4-data1.xlsx]

## Sheet: Figure 4
WT LB	ΔfloAT LB	WT LB BnOH	ΔfloAT BnOH	WT SMM	ΔfloAT SMM
112	37	65	67	66	58
89	46	61	61	44	52
79	33	54	82	51	69
133	49	79	89	54	75
115	47	53	87	55	57
83	47	85	77	67	65
106	23	41	64	64	53
87	57	69	77	67	59
87	41	44	94	55	73
73	48	45	73	44	68
79	48	77	92	44	99
114	62	65	47	52	65
66	48	52	56	38	41
106	45	62	92	67	78
96	61	41	62	64	78
85	57	75	85	57	43
111	46	51	48	55	65
104	54	55	79	87	92
118	55	45	74	42	56
119	49	87	67	62	68
145	32	61	84	39	91
83	35	116	94	46	68
105	37	96	64	73	47
78	51	78	61	28	68
131	38	96	87	68	61
92	43	98	59	75	102
82	56	88	84	72	84
111	39	78	115	55	77
128	29	90	90	61	95
102	37	81	92	69	88
108	23	114	74	78	66
116	28	116	74	55	61
74	37	89	97	38	57
114	35	88	105	65	56
58	54	81	127	42	71
78	32	64	69	66	34
84	26	56	68	42	55
82	51	97	122	45	53
87	63	97	92	56	47
68	52	109	74	62	63
89	51	79	74	44	61
92	22	75	97	81	65
69	27	91	105	41	49
78	31	64	31	51
52	36	104	36	71
79	41	124	41	57
84	26	99	26	53
57	35	103	35	59
71	38	106	38	58
114	51	78	51	51
114	46	69	46	55
83	41	117	41	68
58	33		33	52
	45		45	65
	37		37	72
	27		27	38
	37		37	39
	41		41	67
	38		38	69
				41
				71
				71
				59
				123
				31
				66
				69
